# Supplementary material
Source: Research Square preprint supplement (doi:10.21203/rs.3.rs-9450762/v1)

Fig.1F

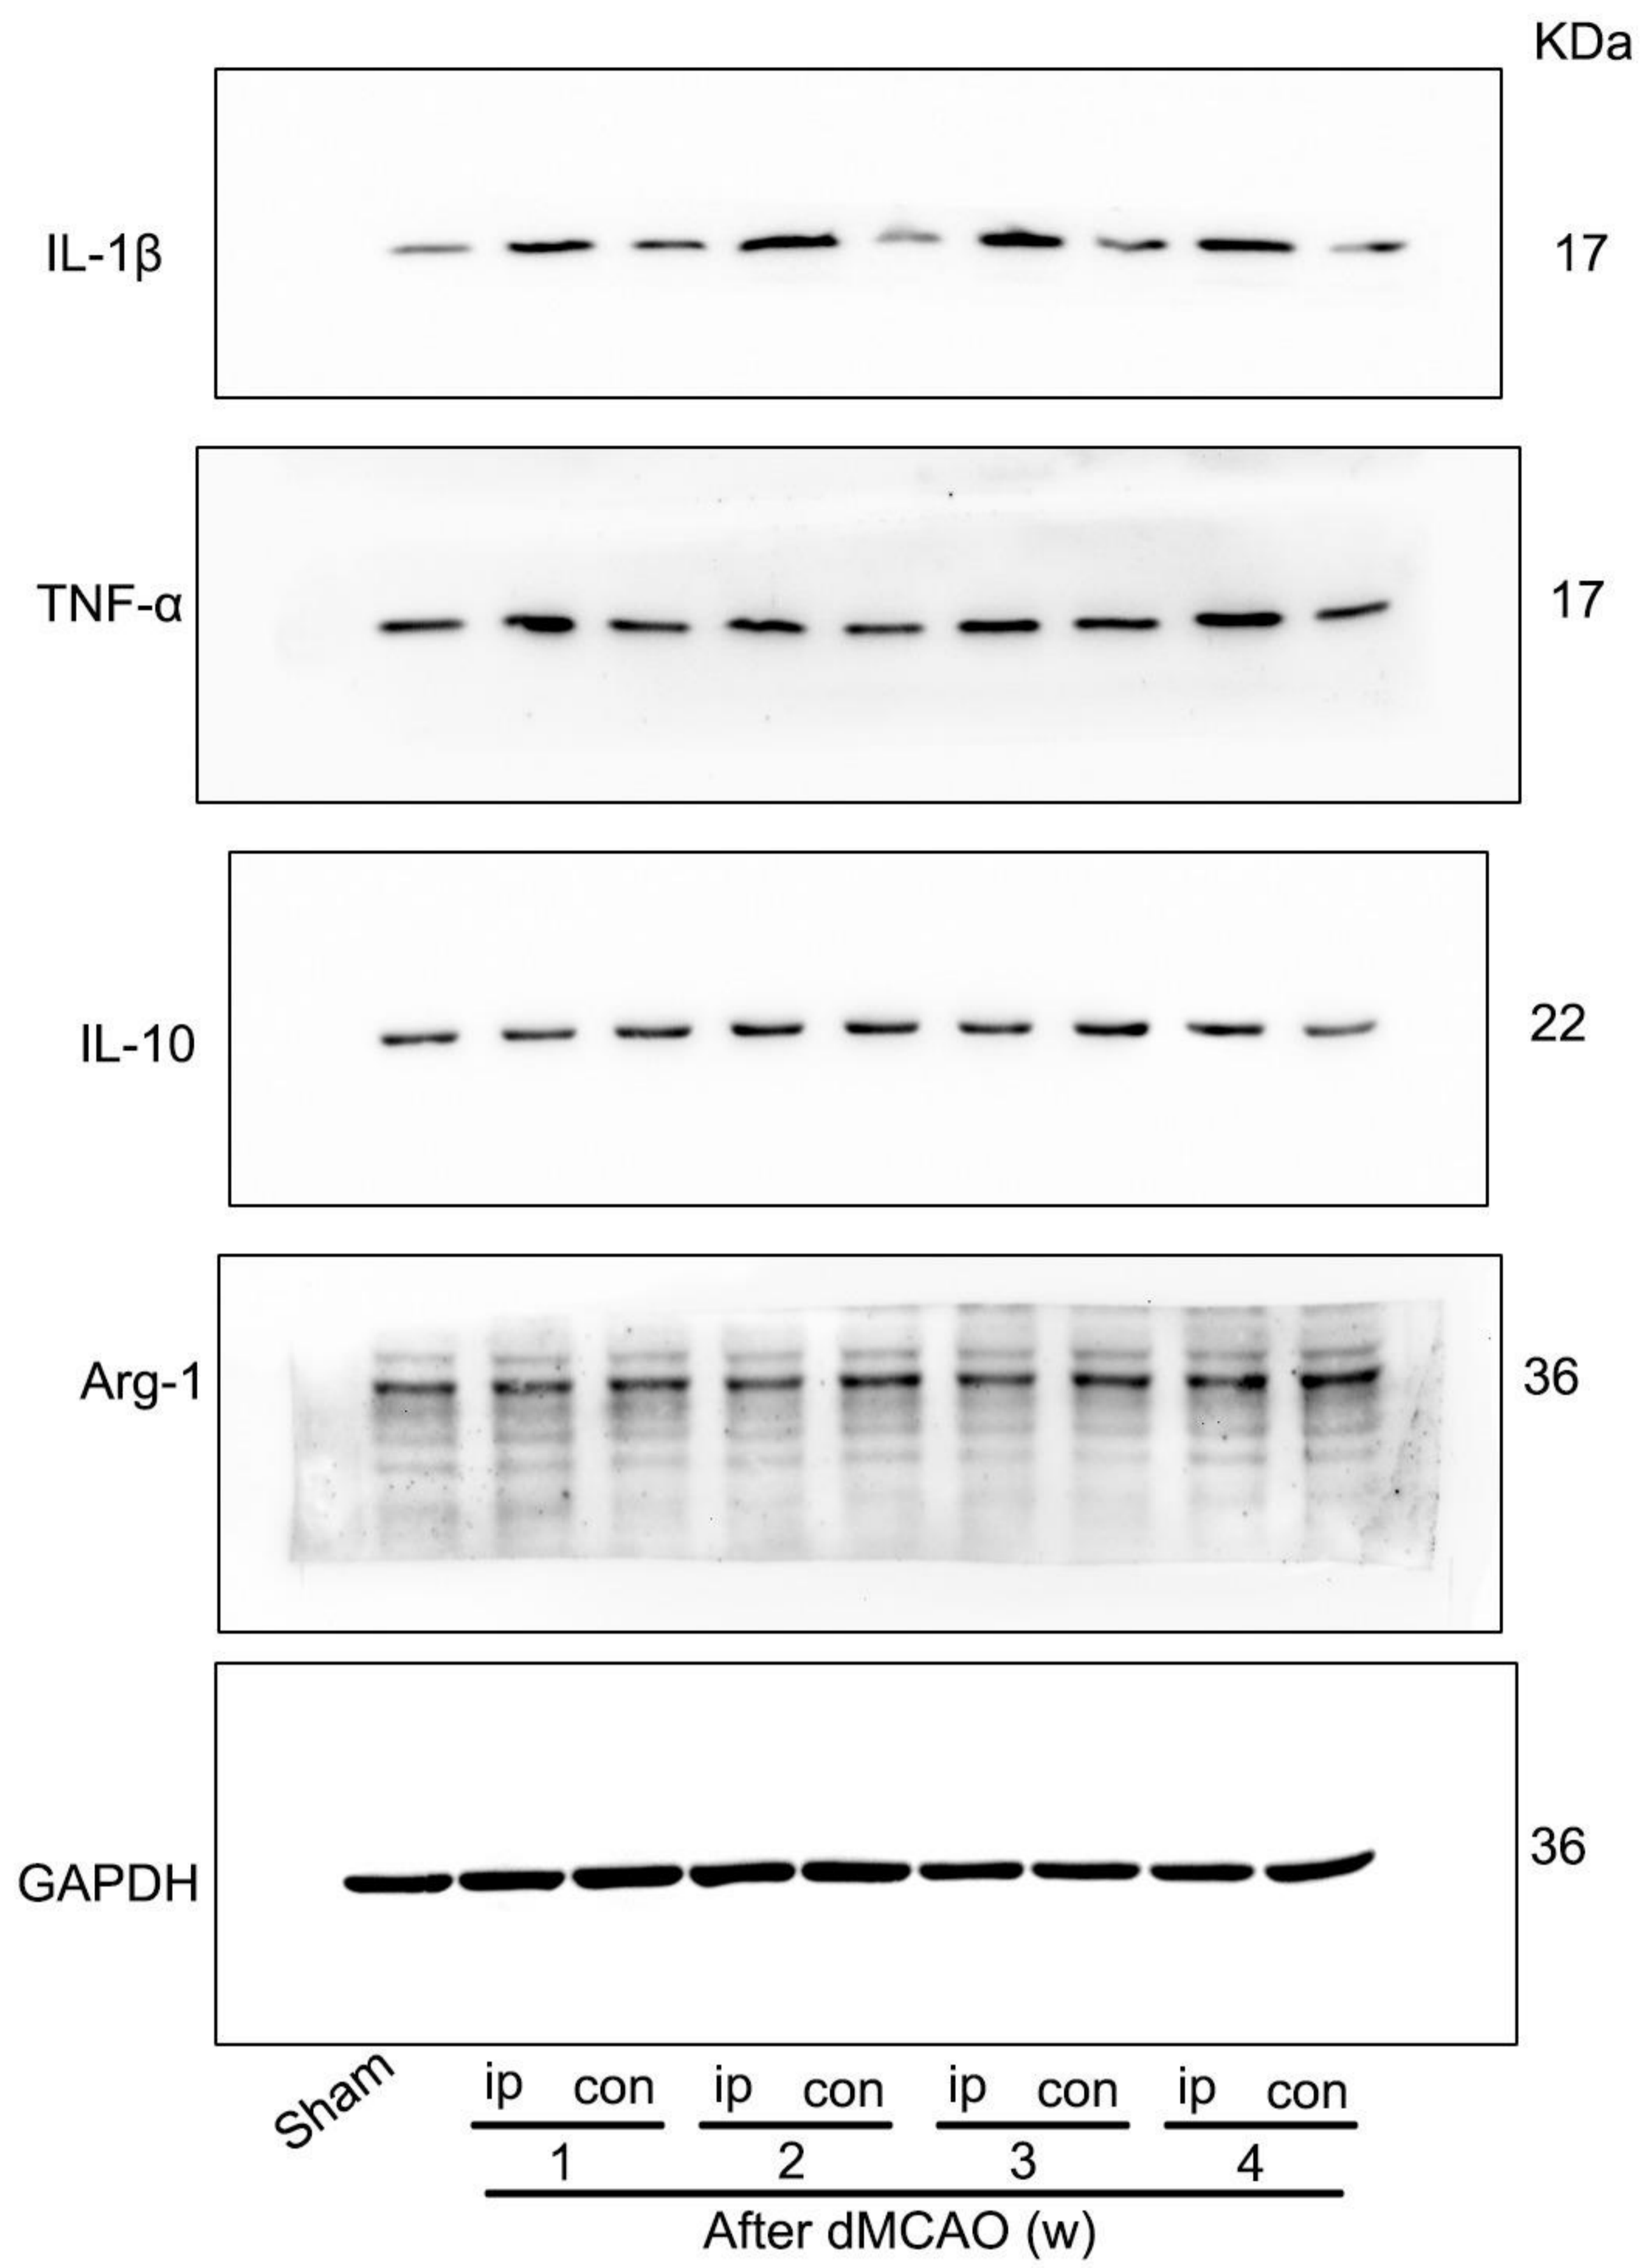

Fig.2H

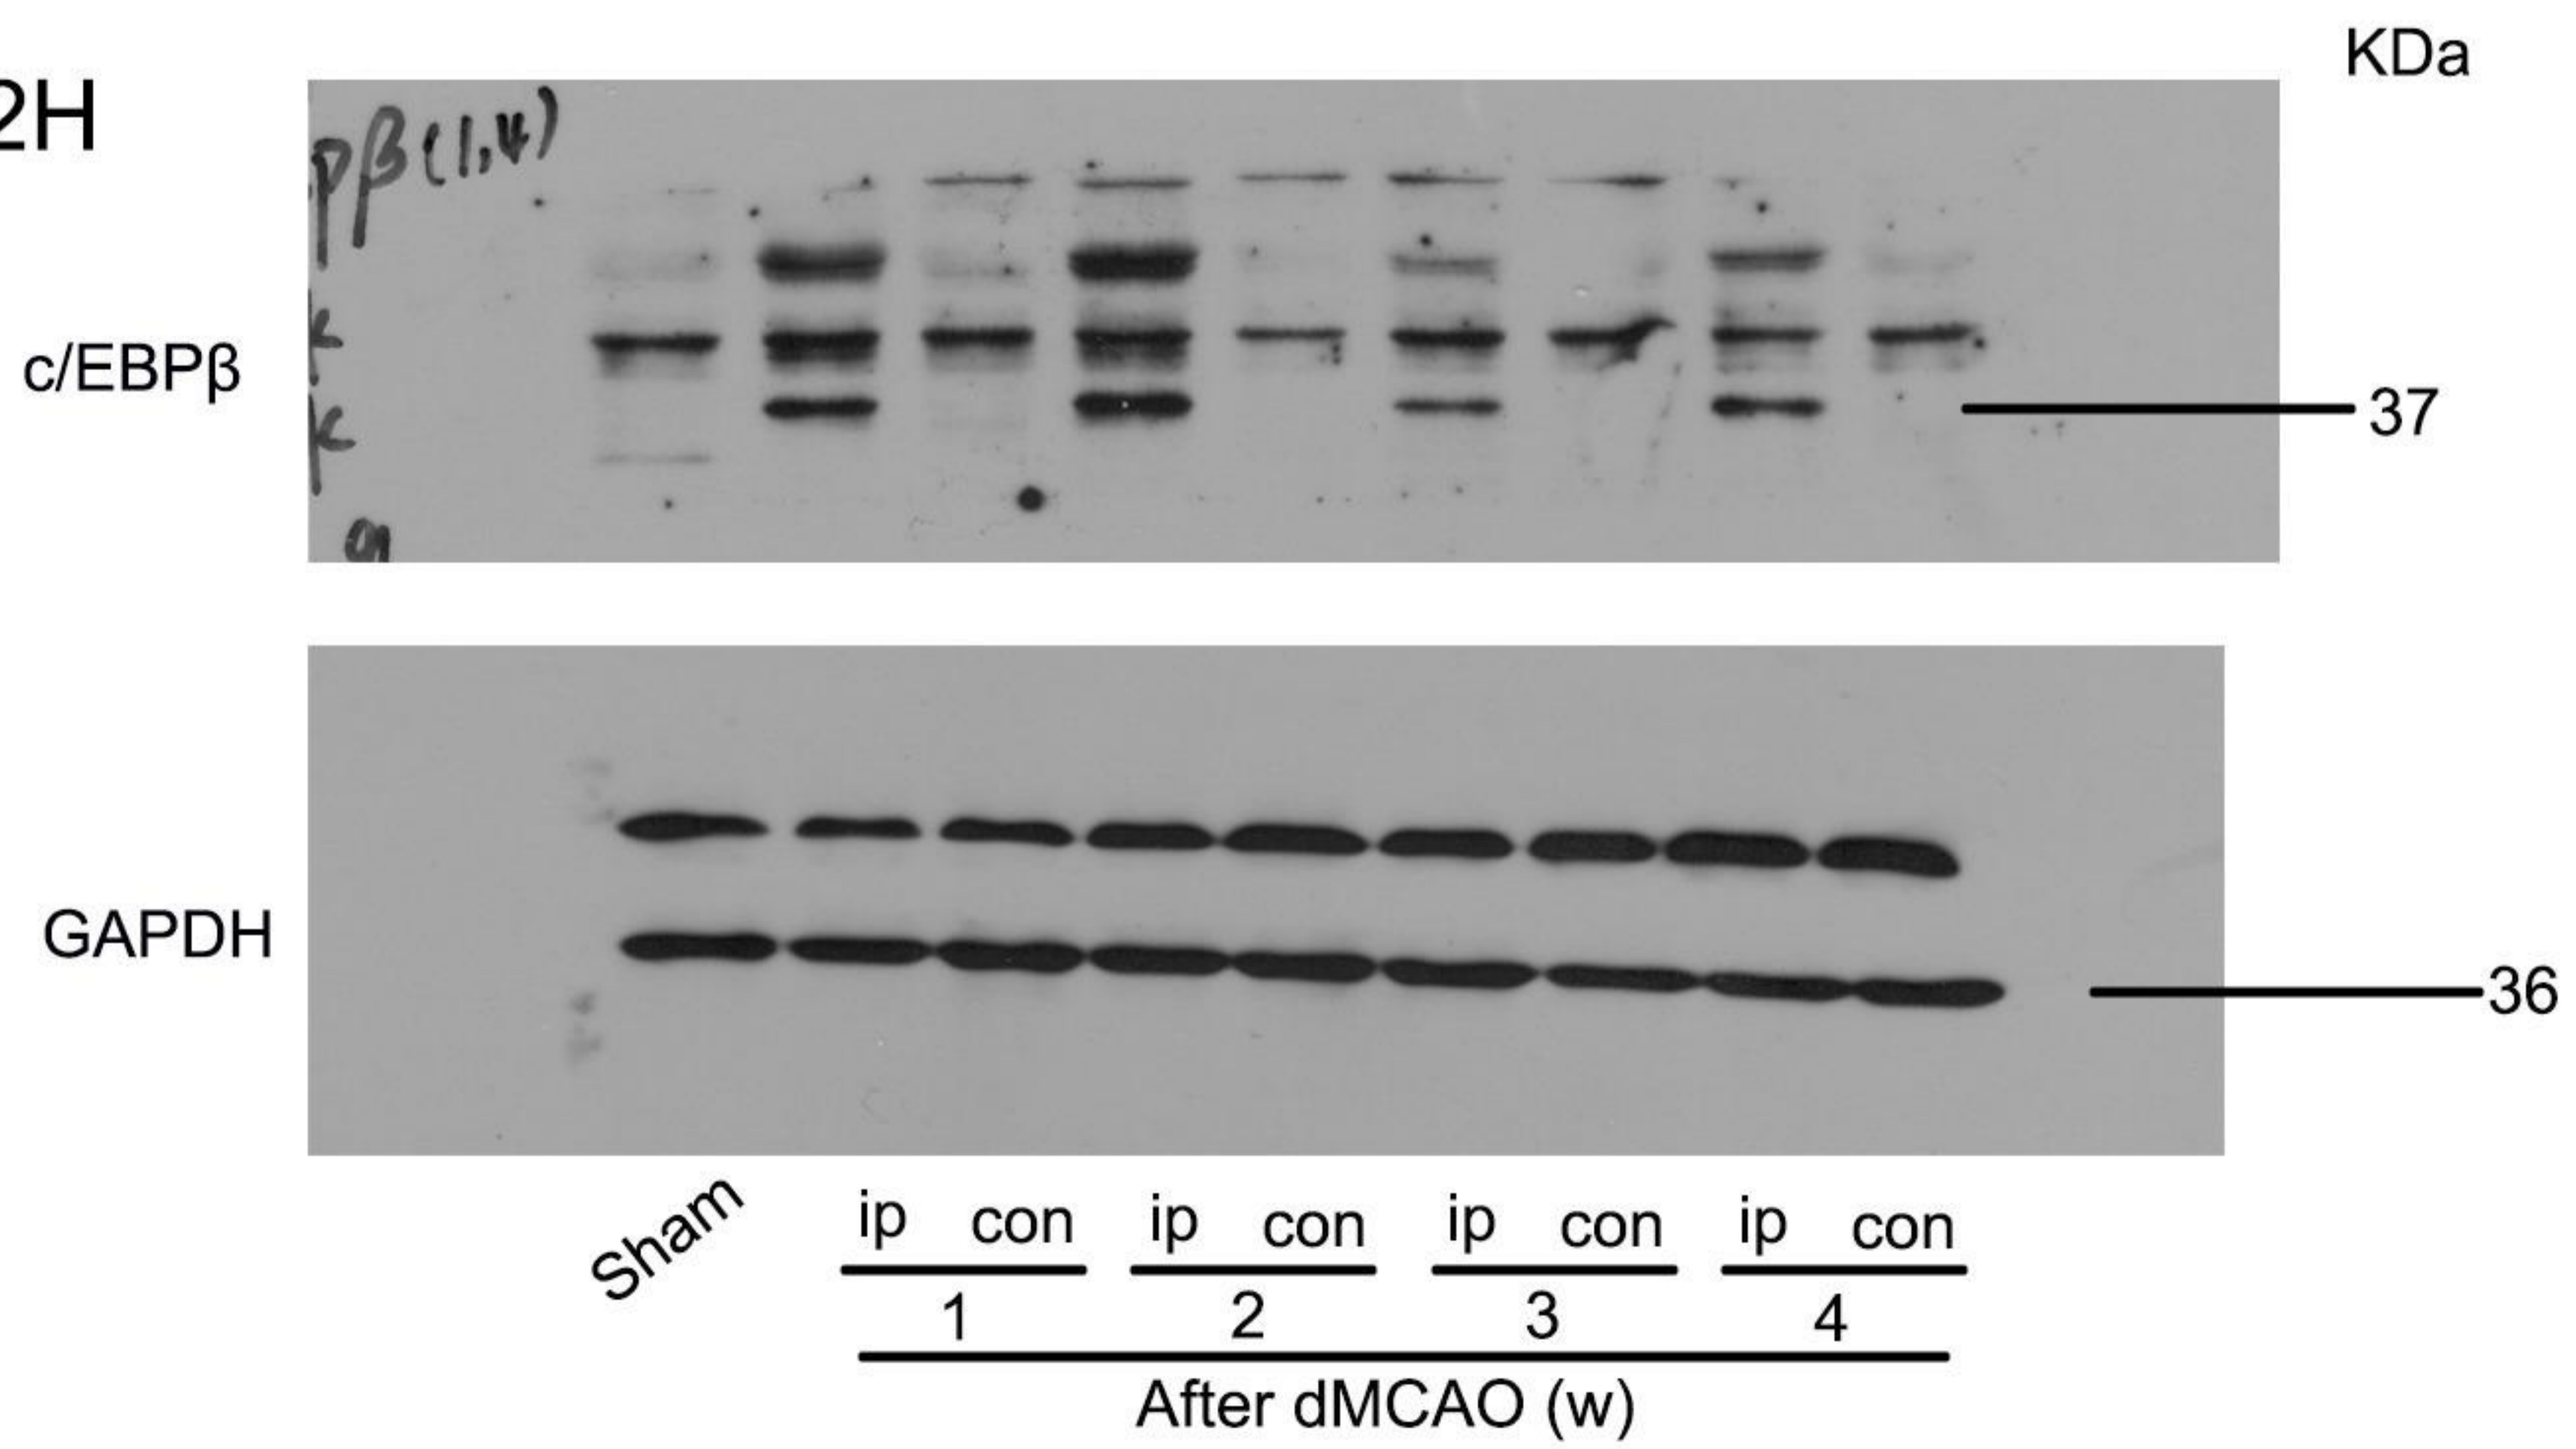

Fig.3A

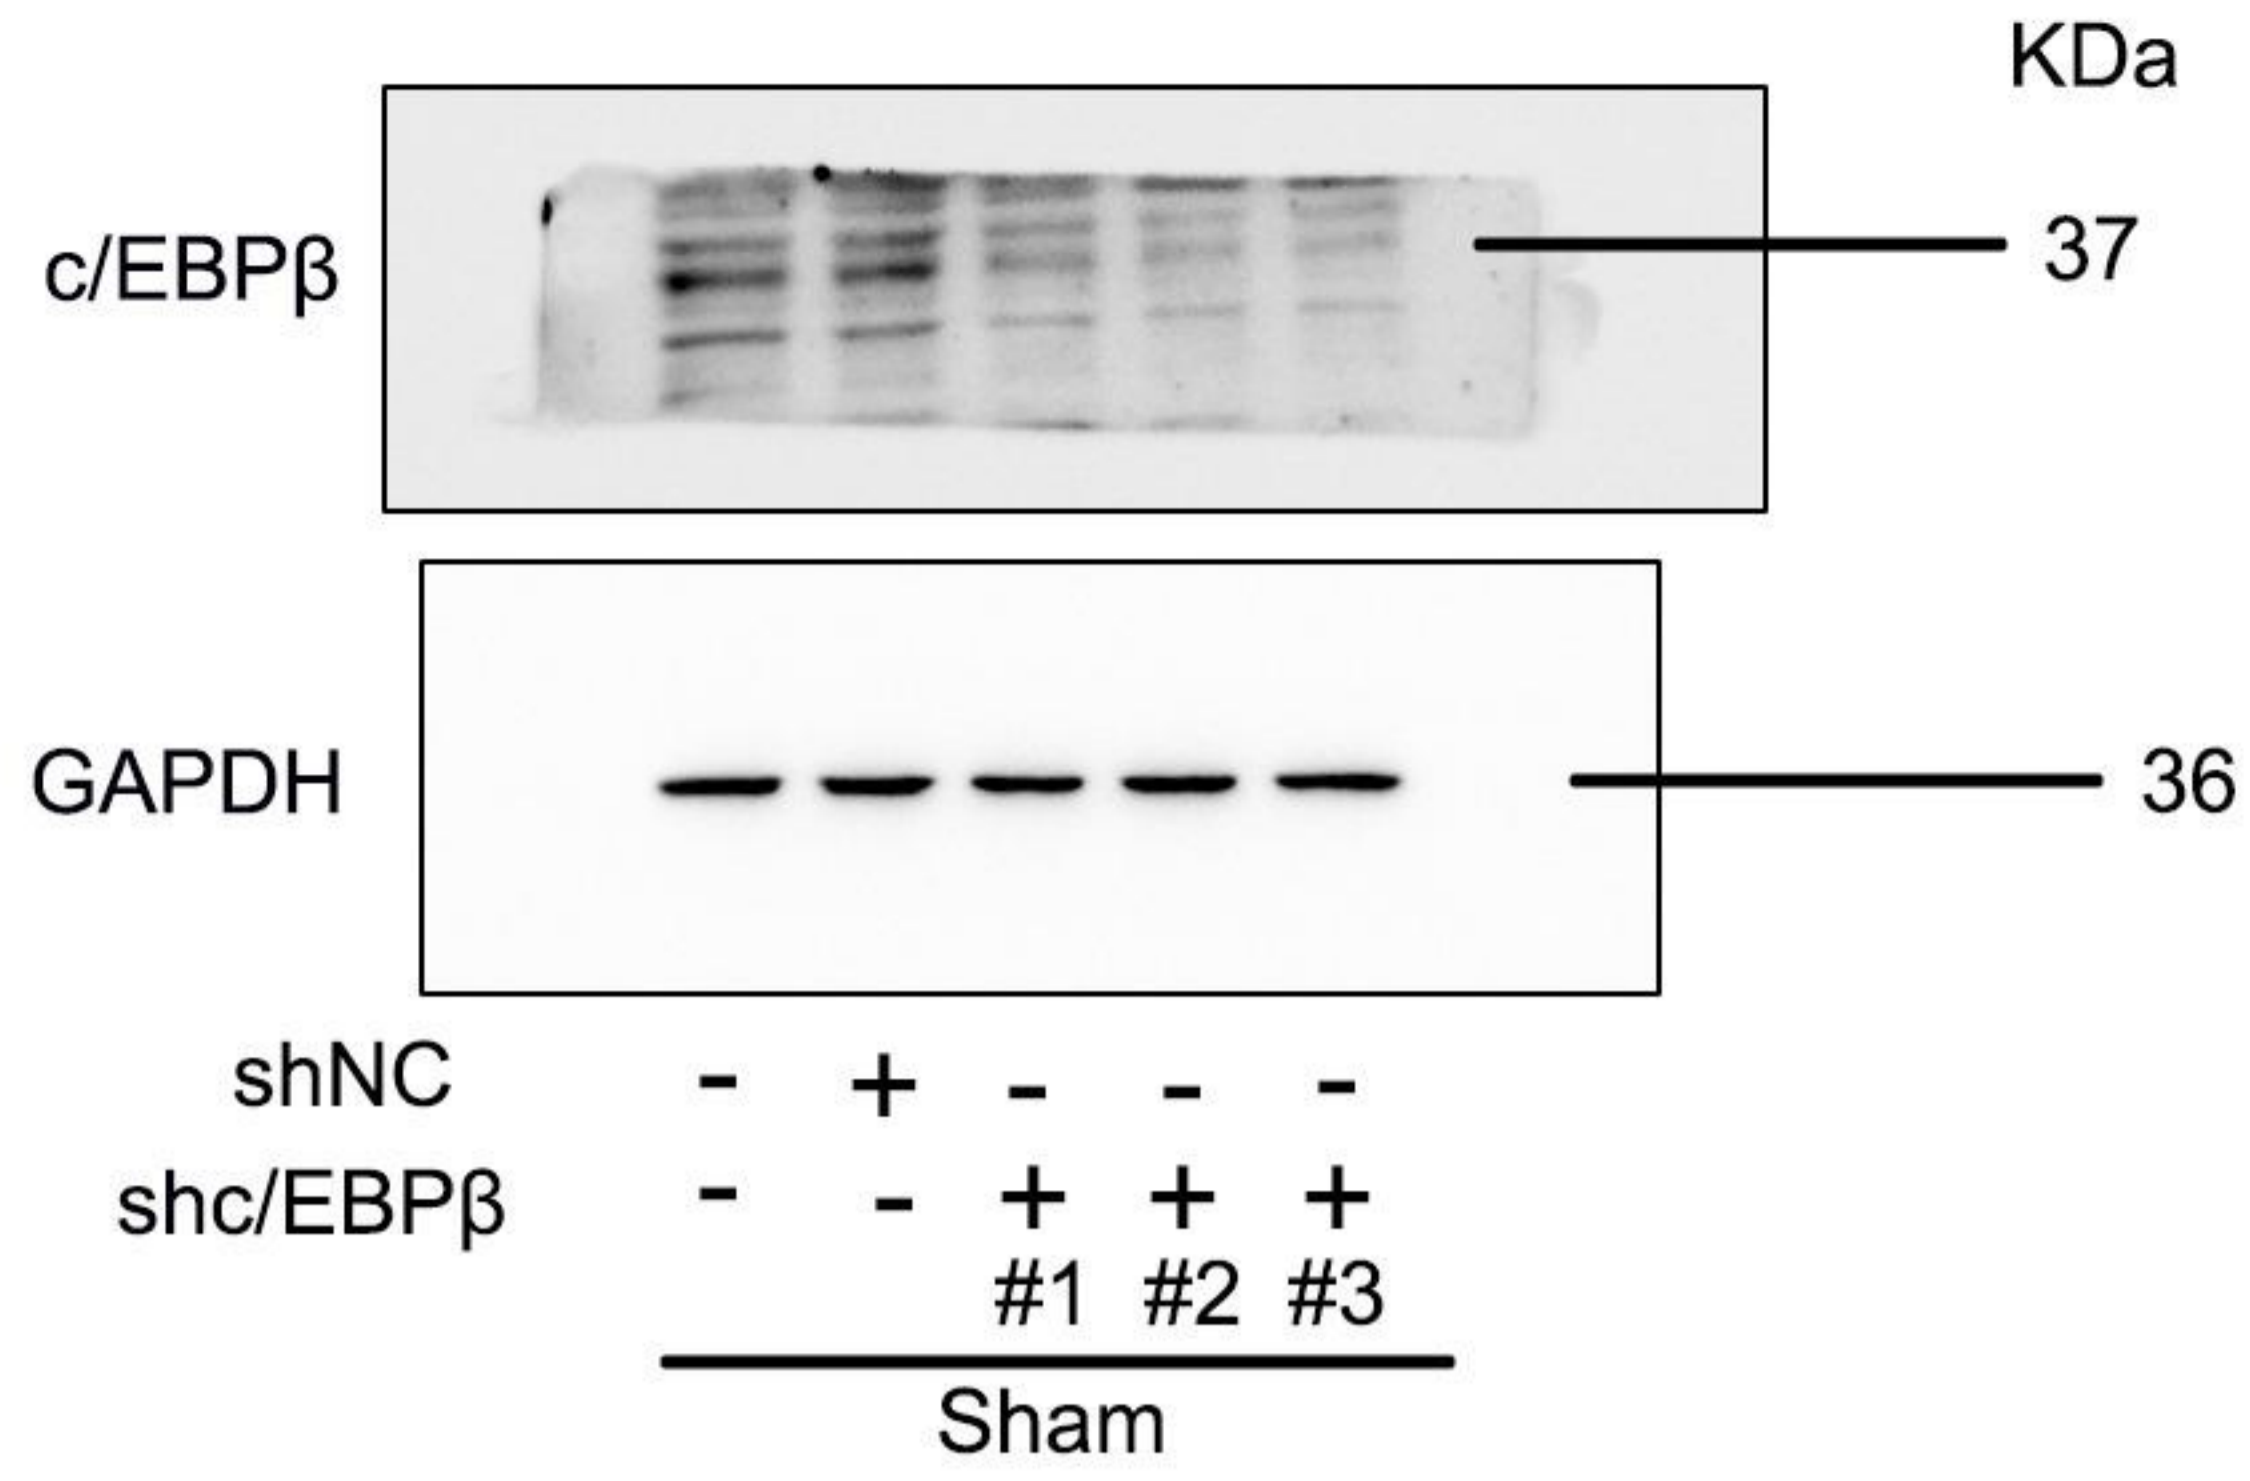

Fig.3B

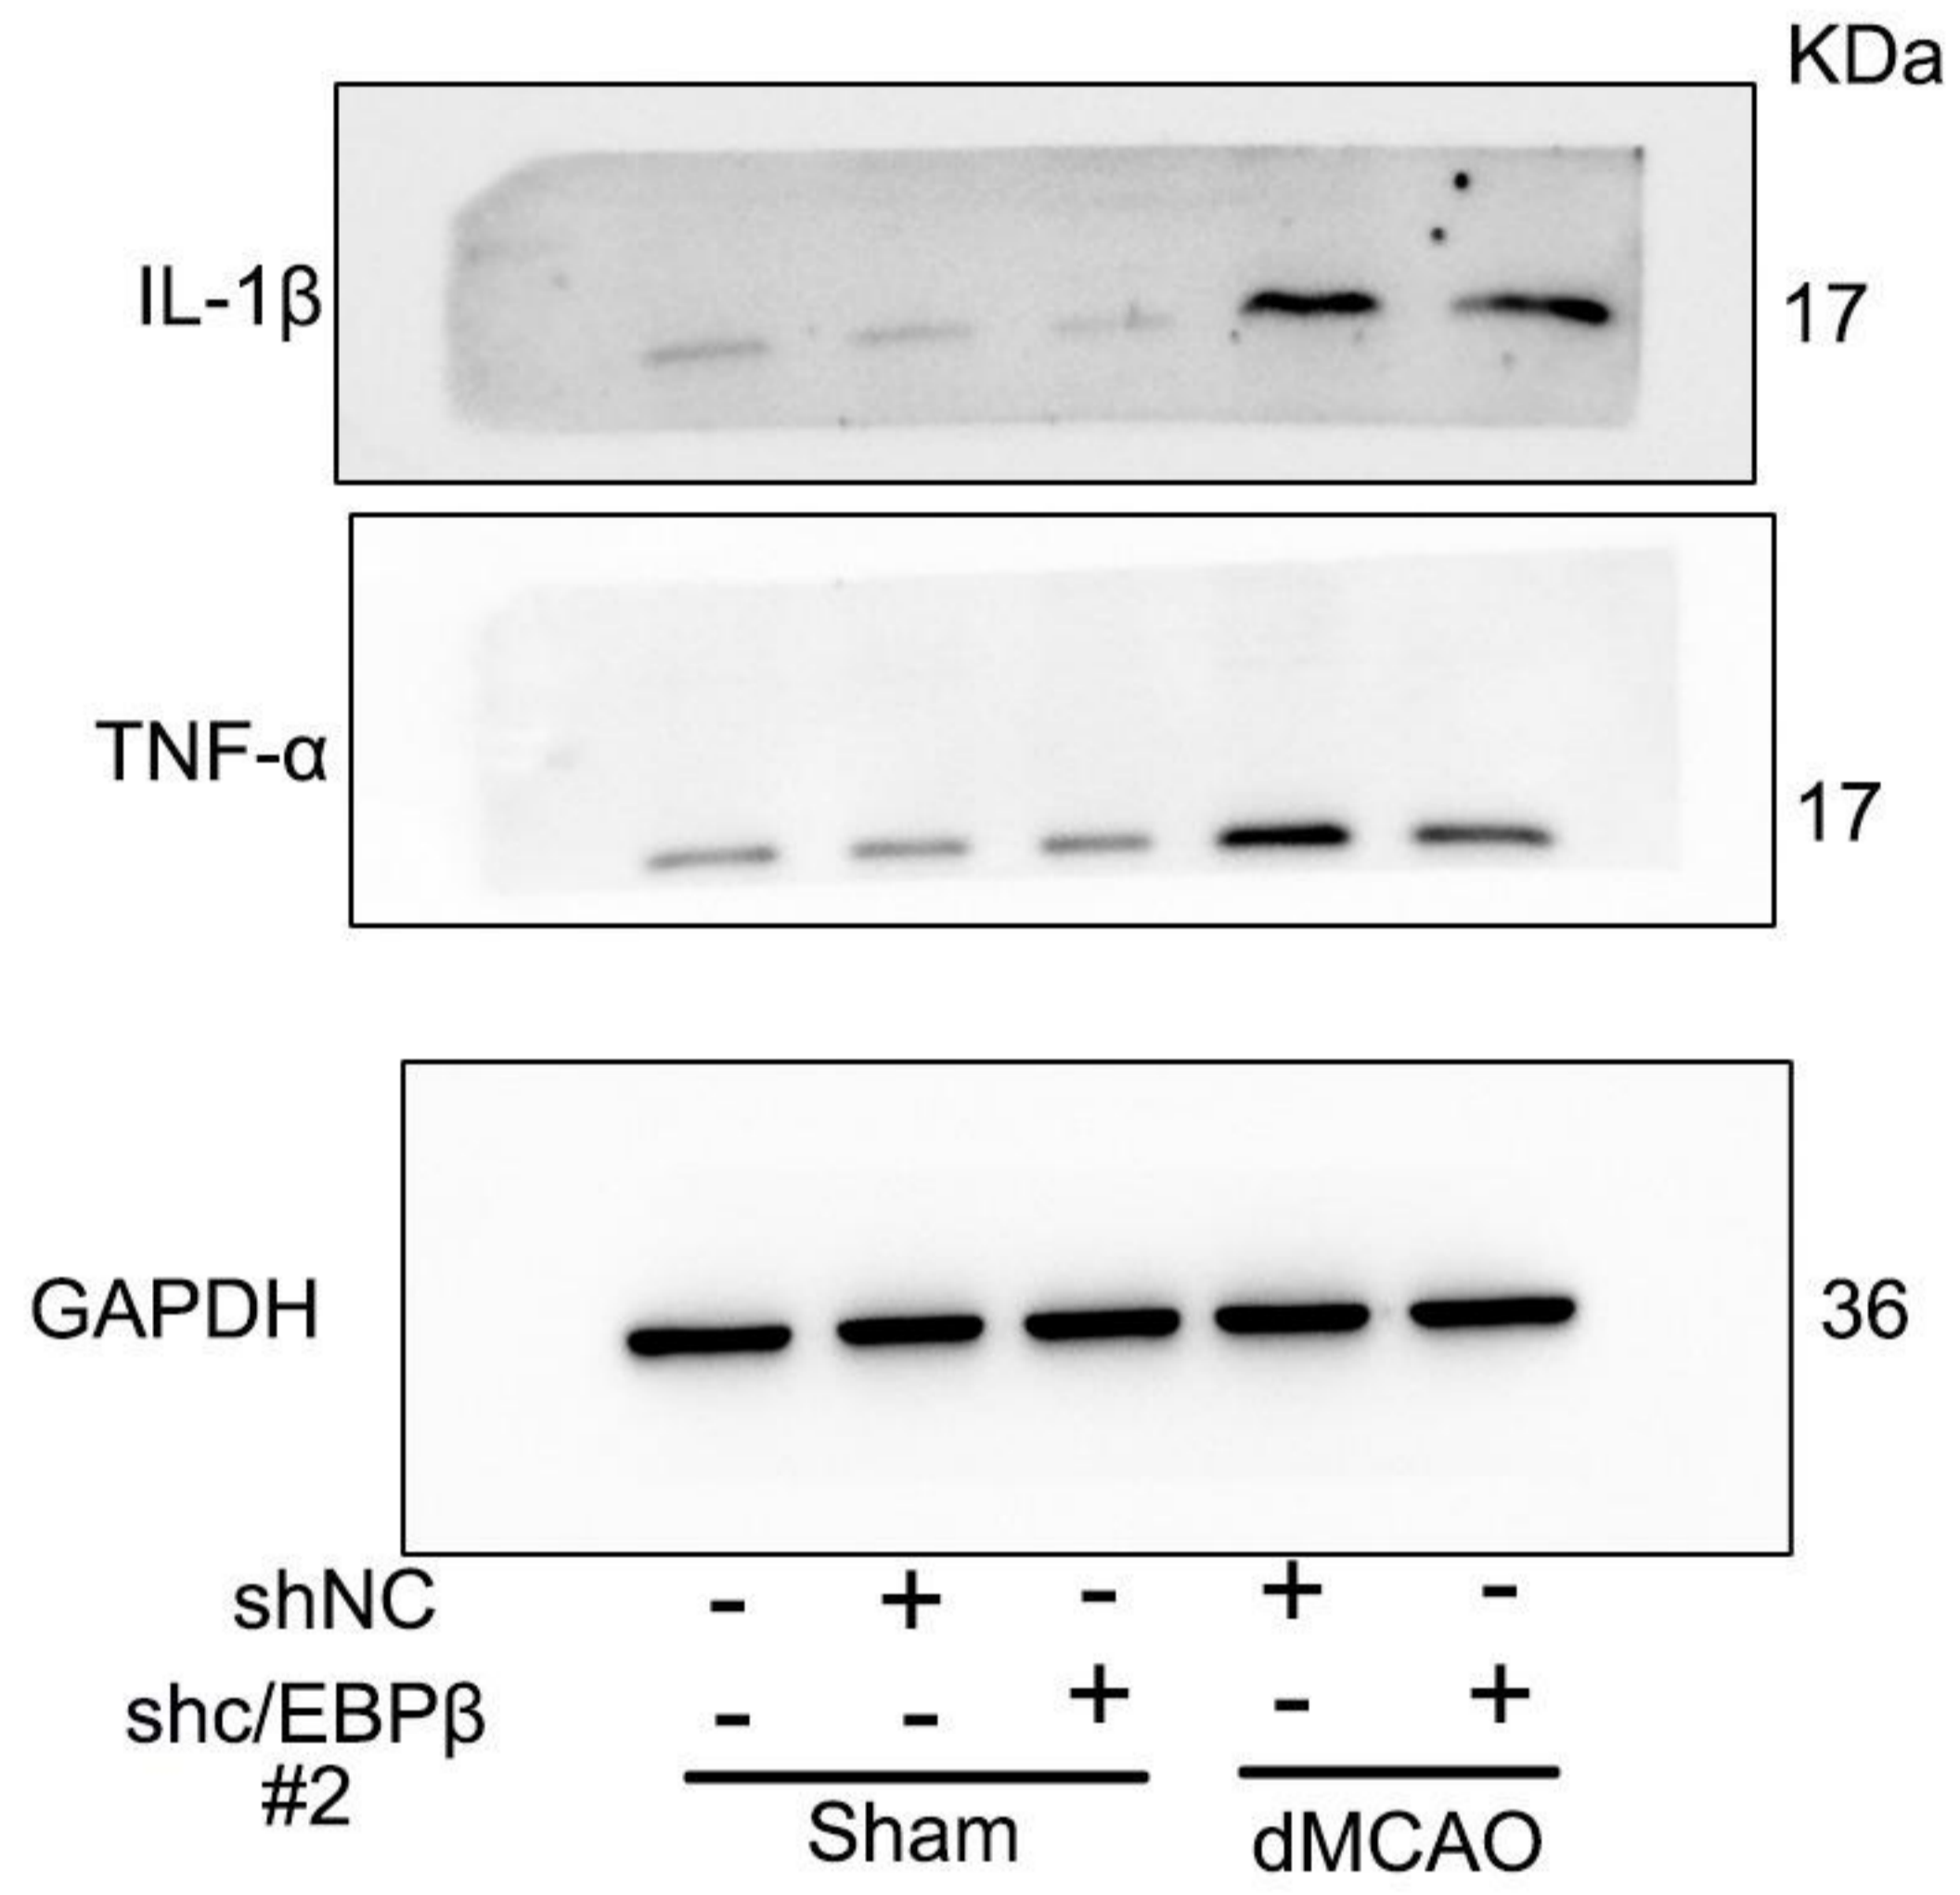

Fig.4C

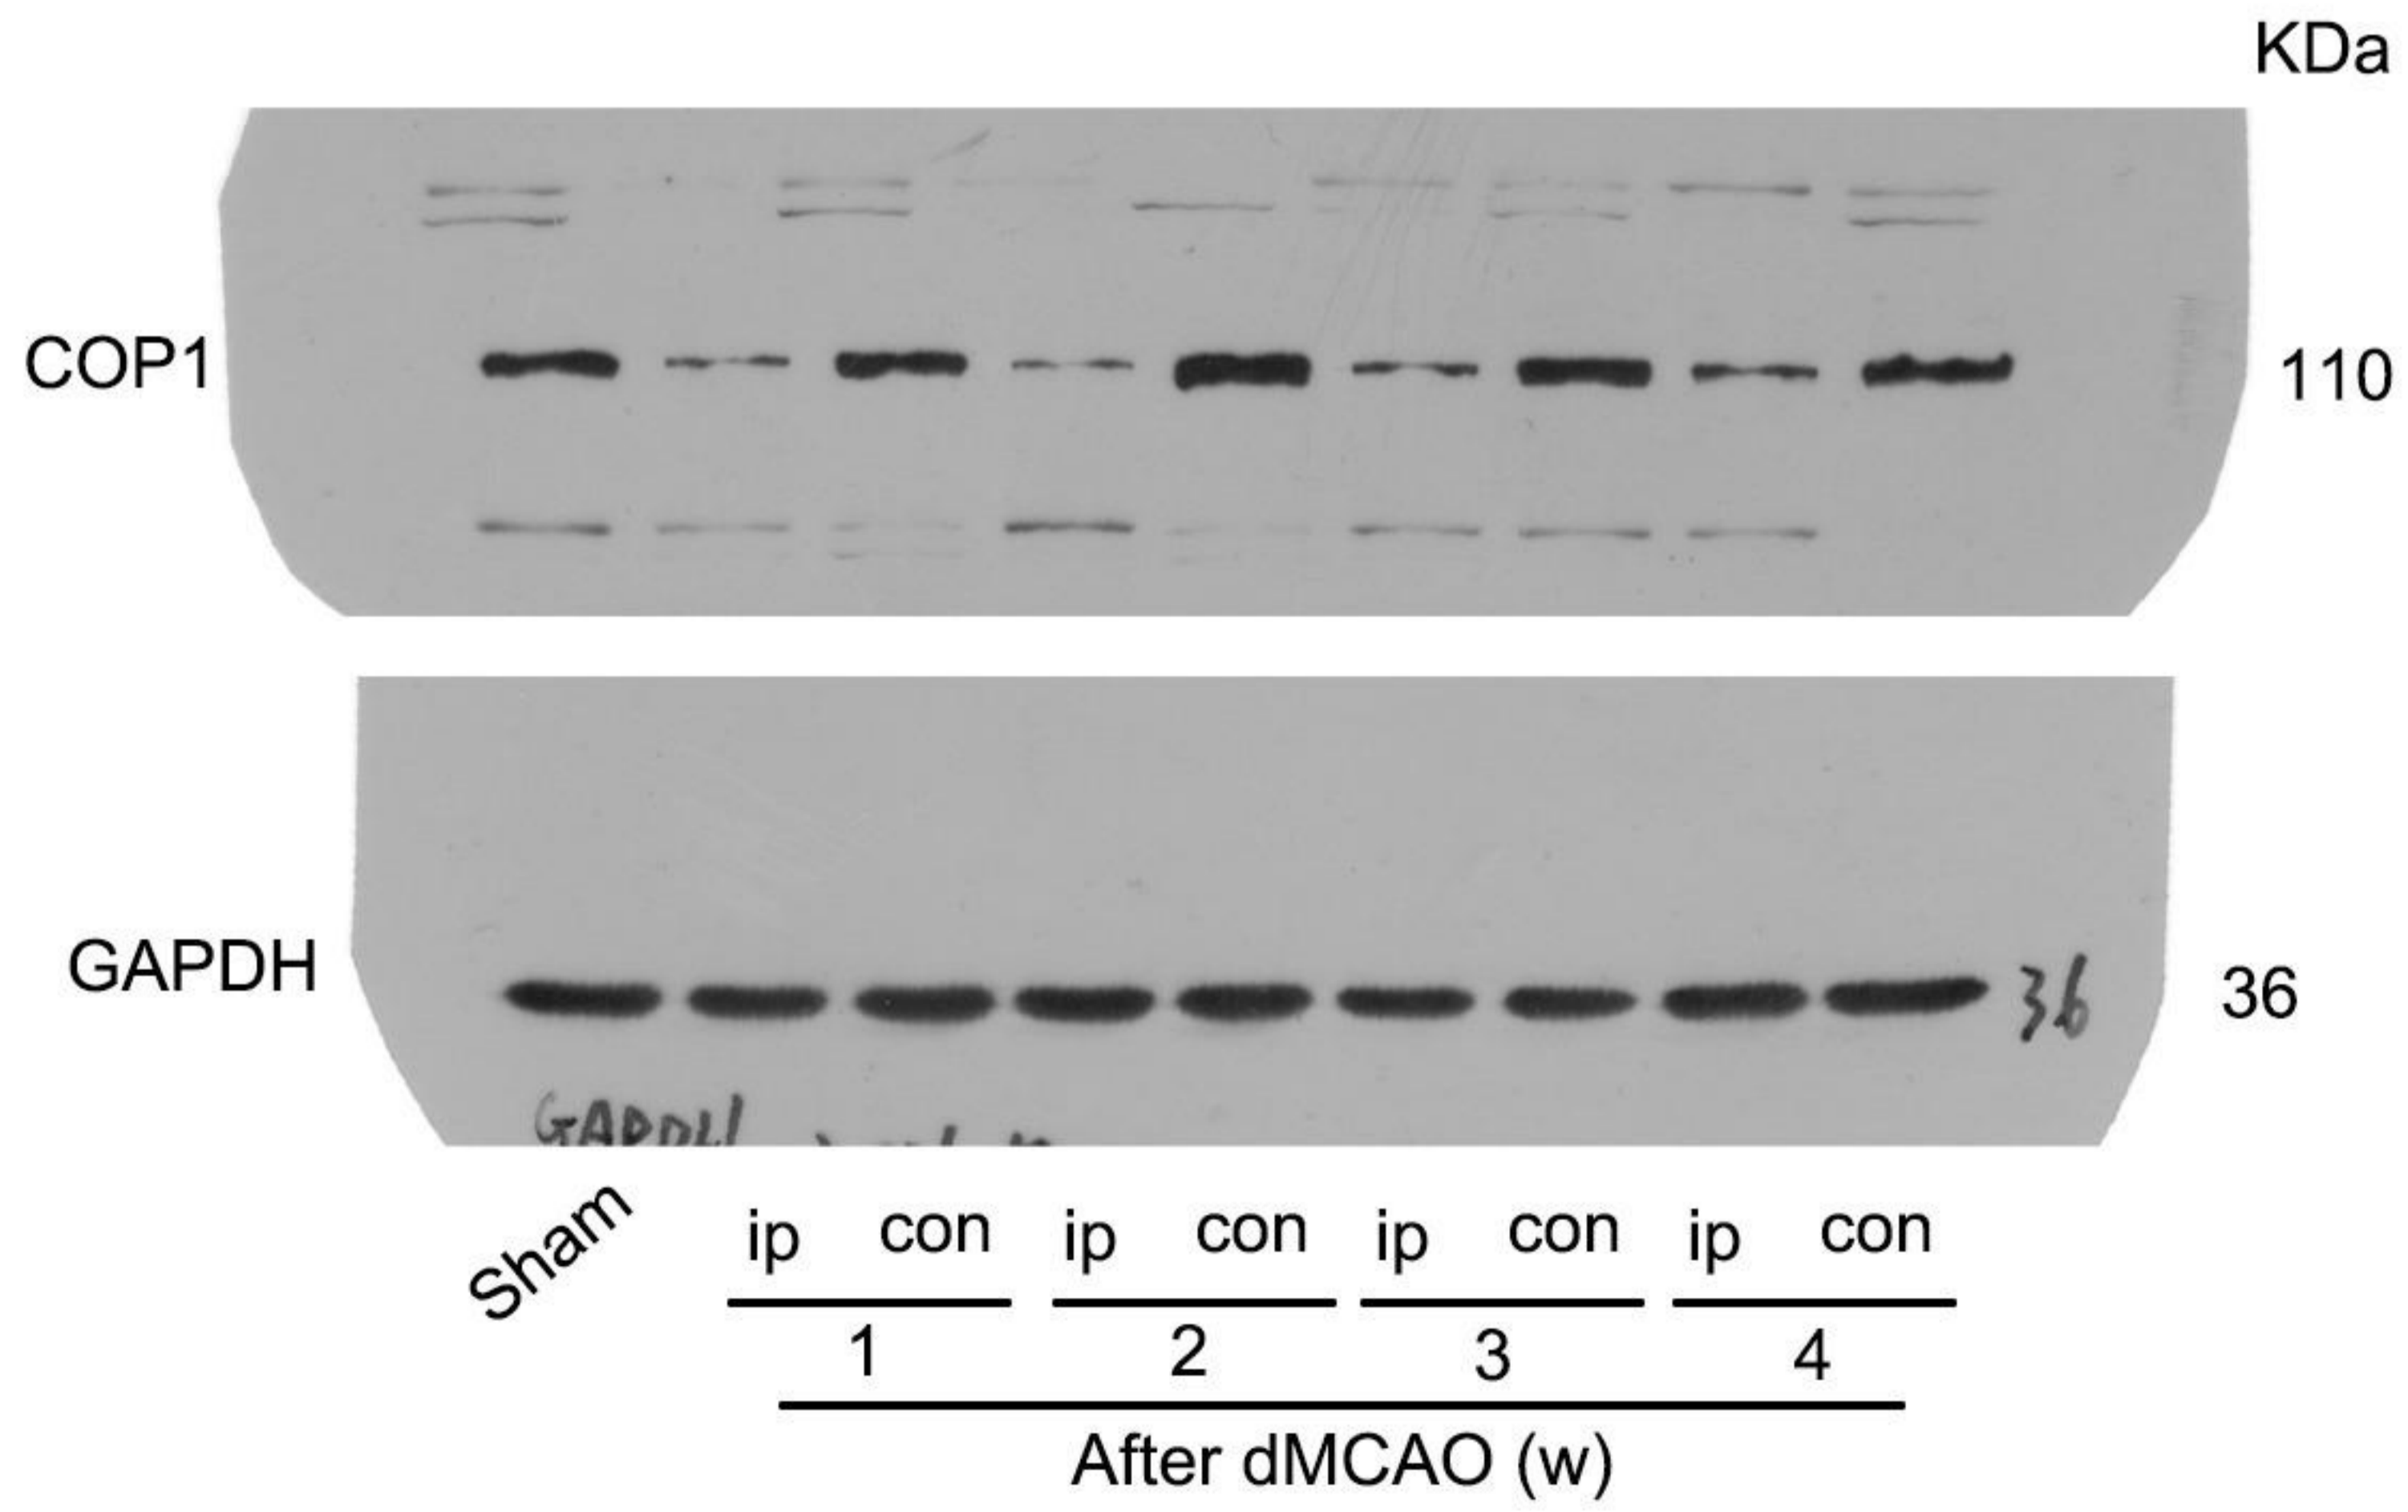

Fig.5A

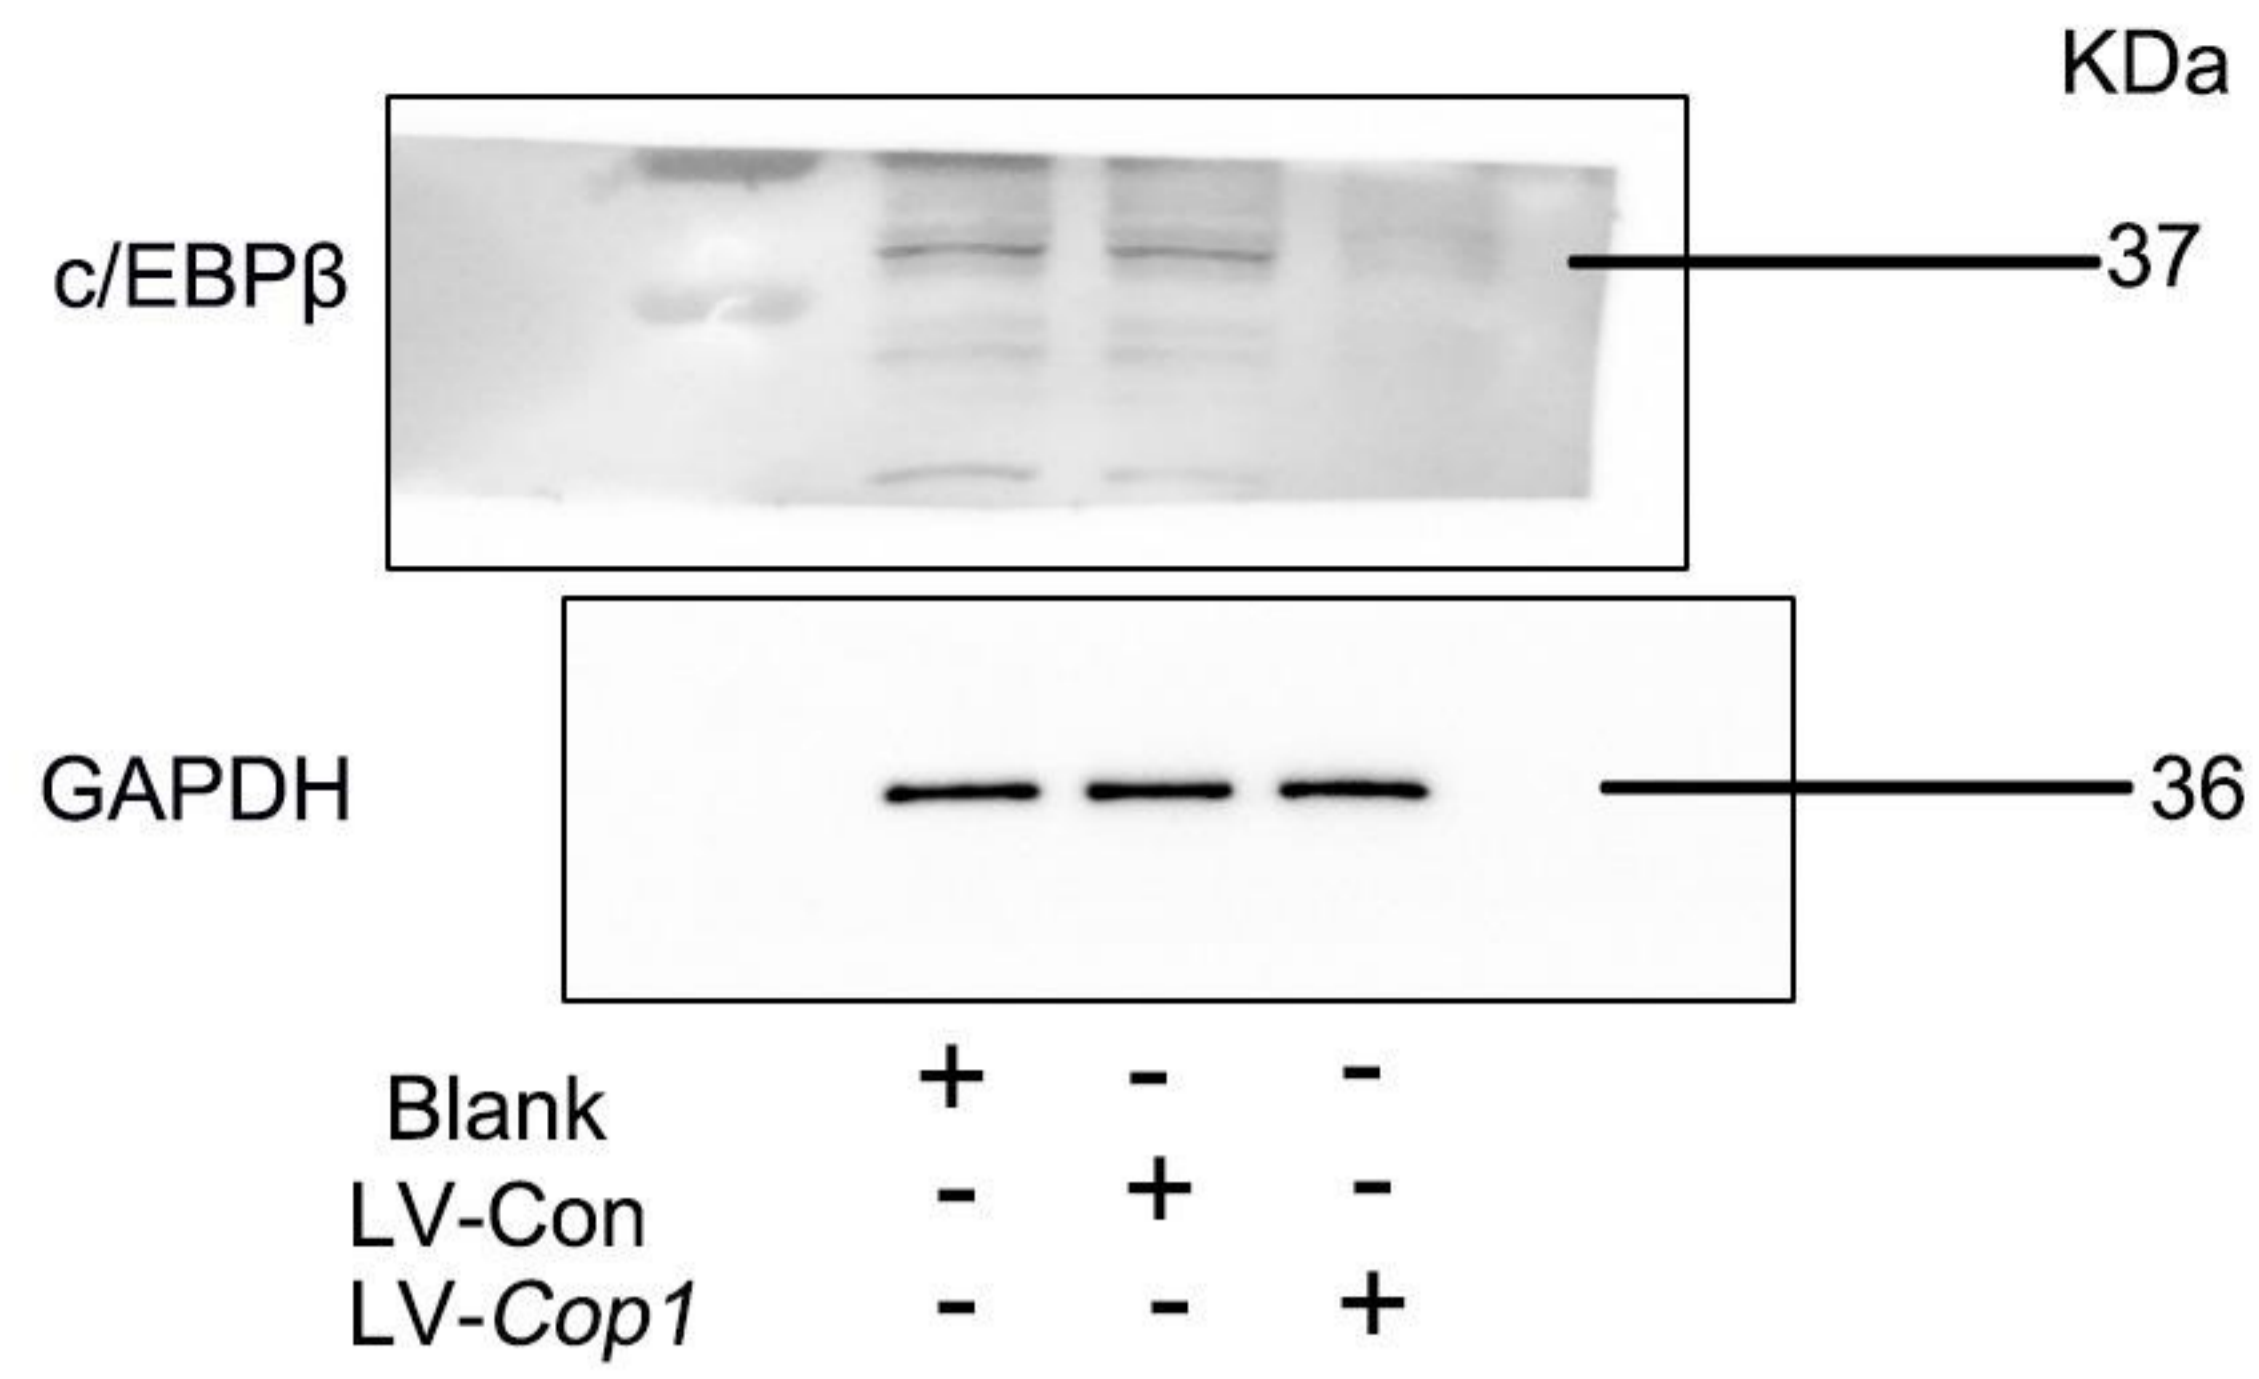

Fig.5B

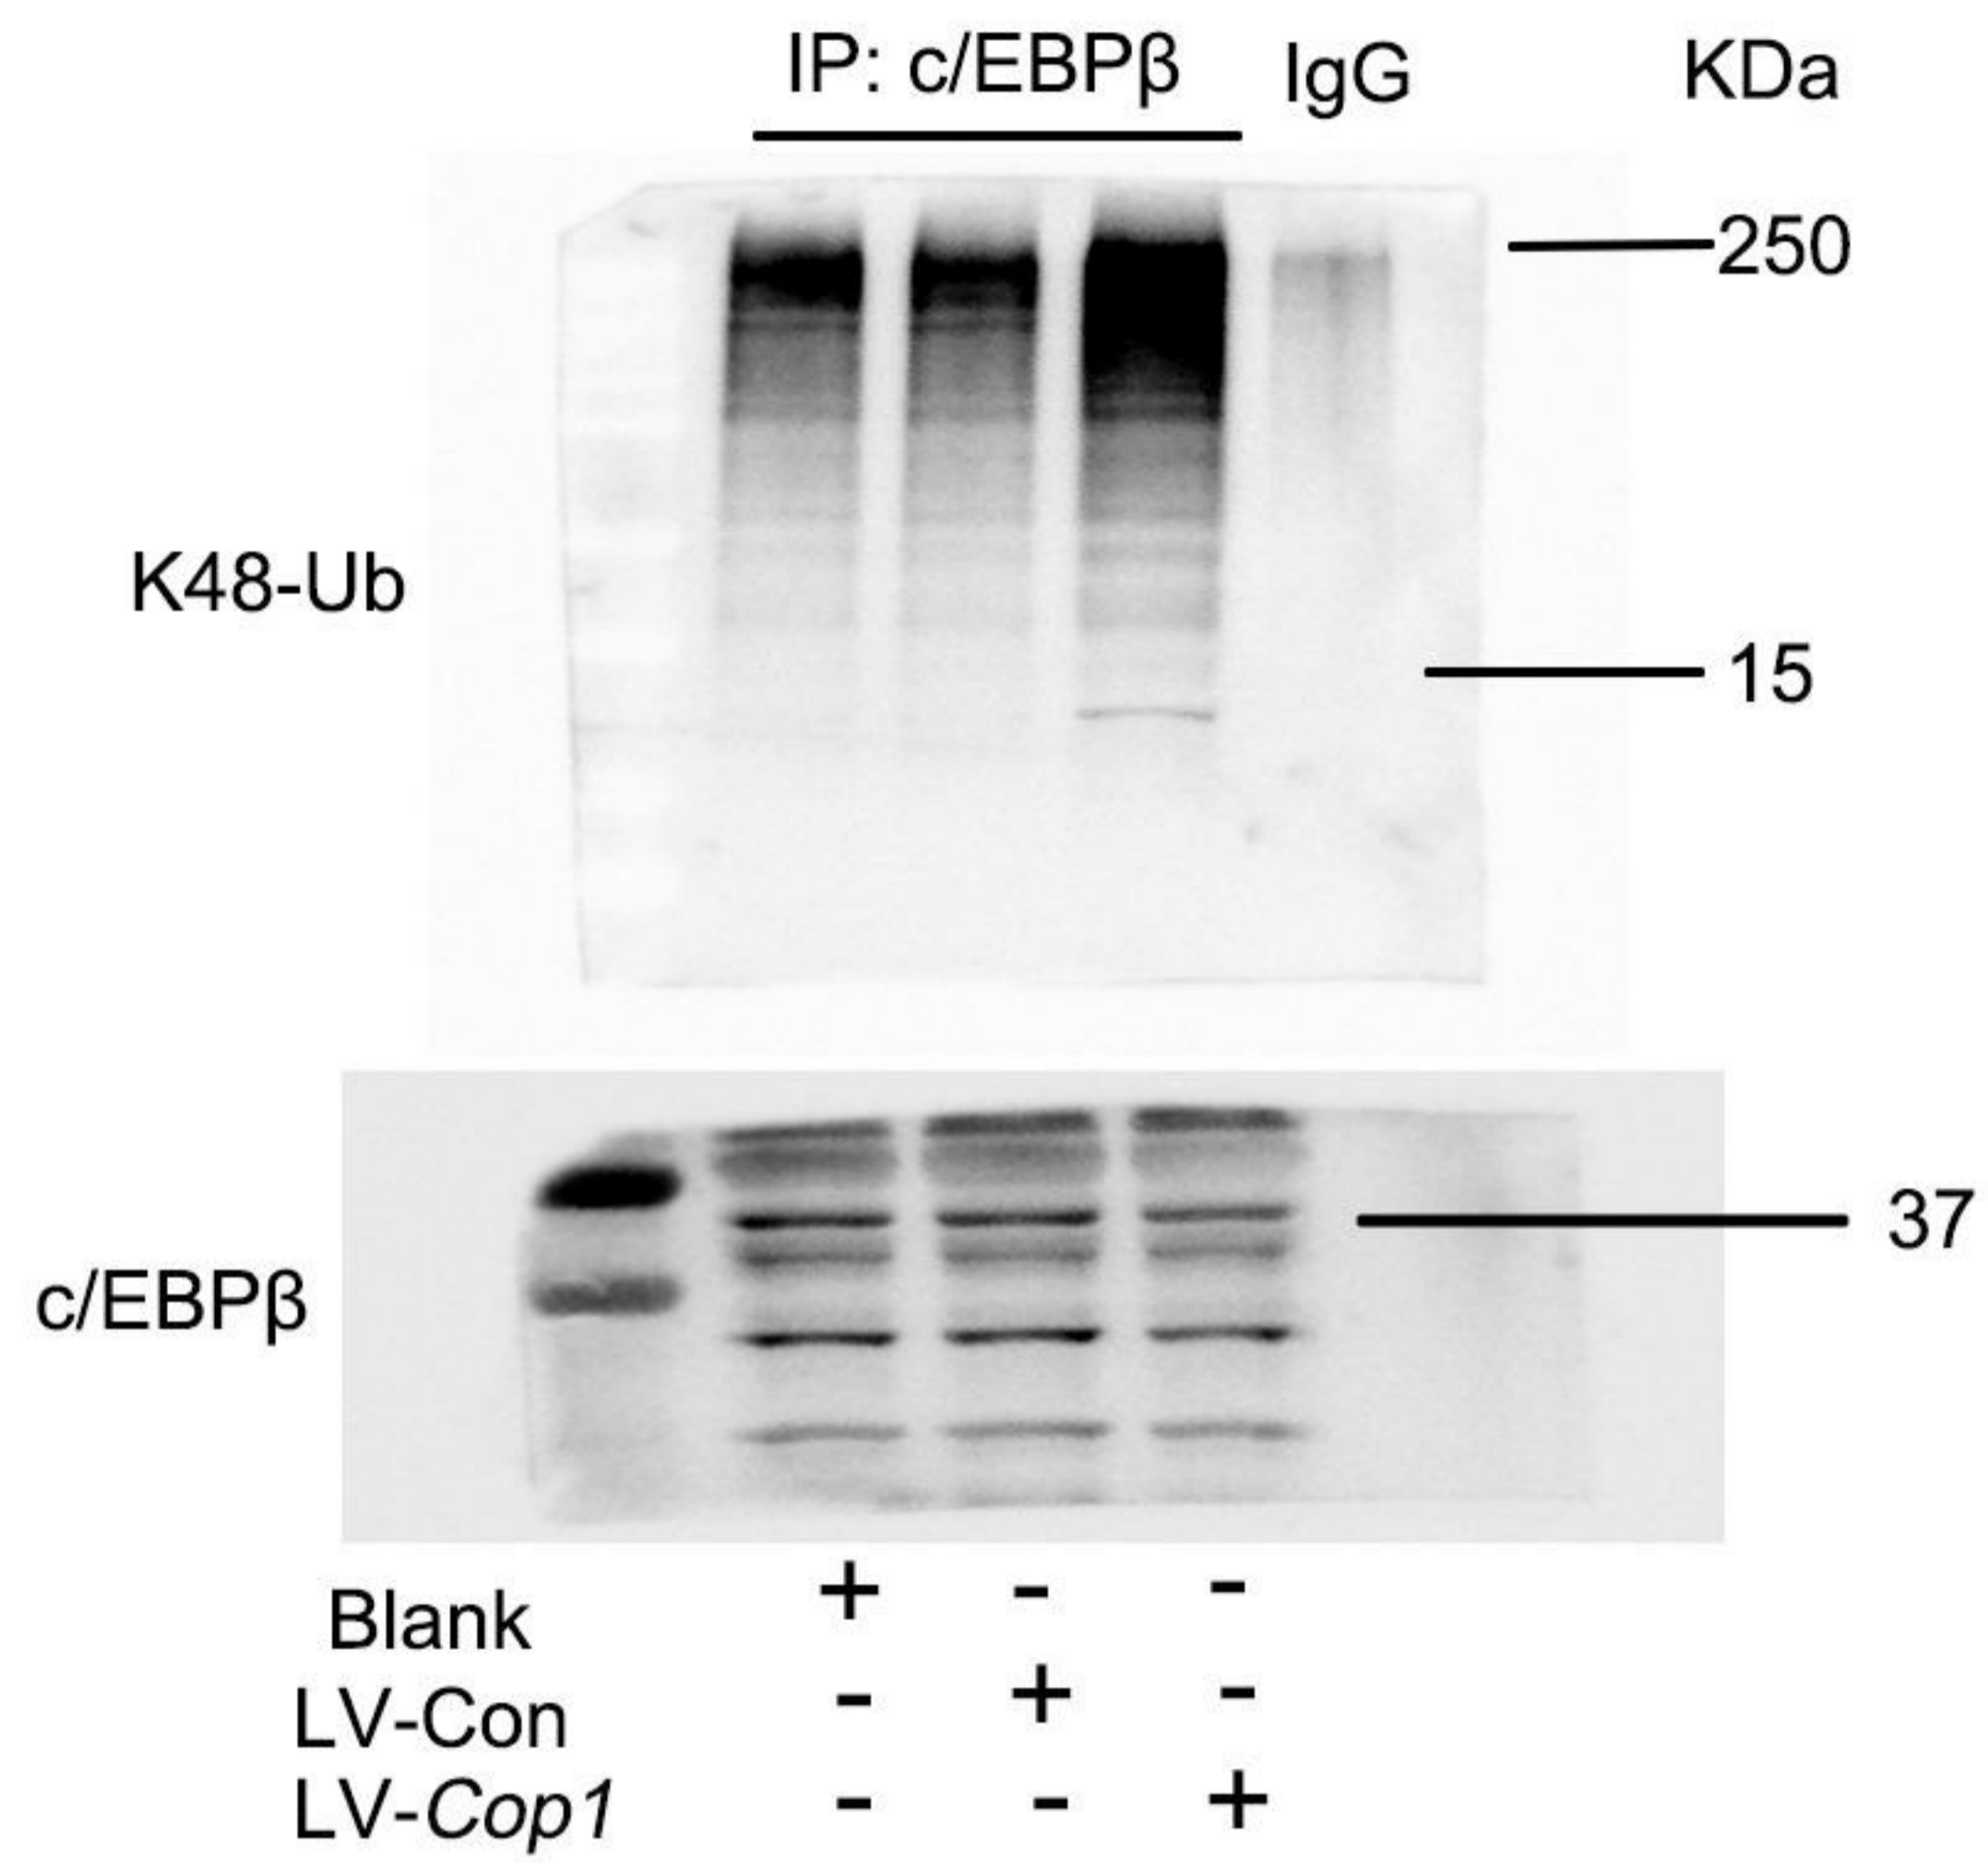

Fig.5E

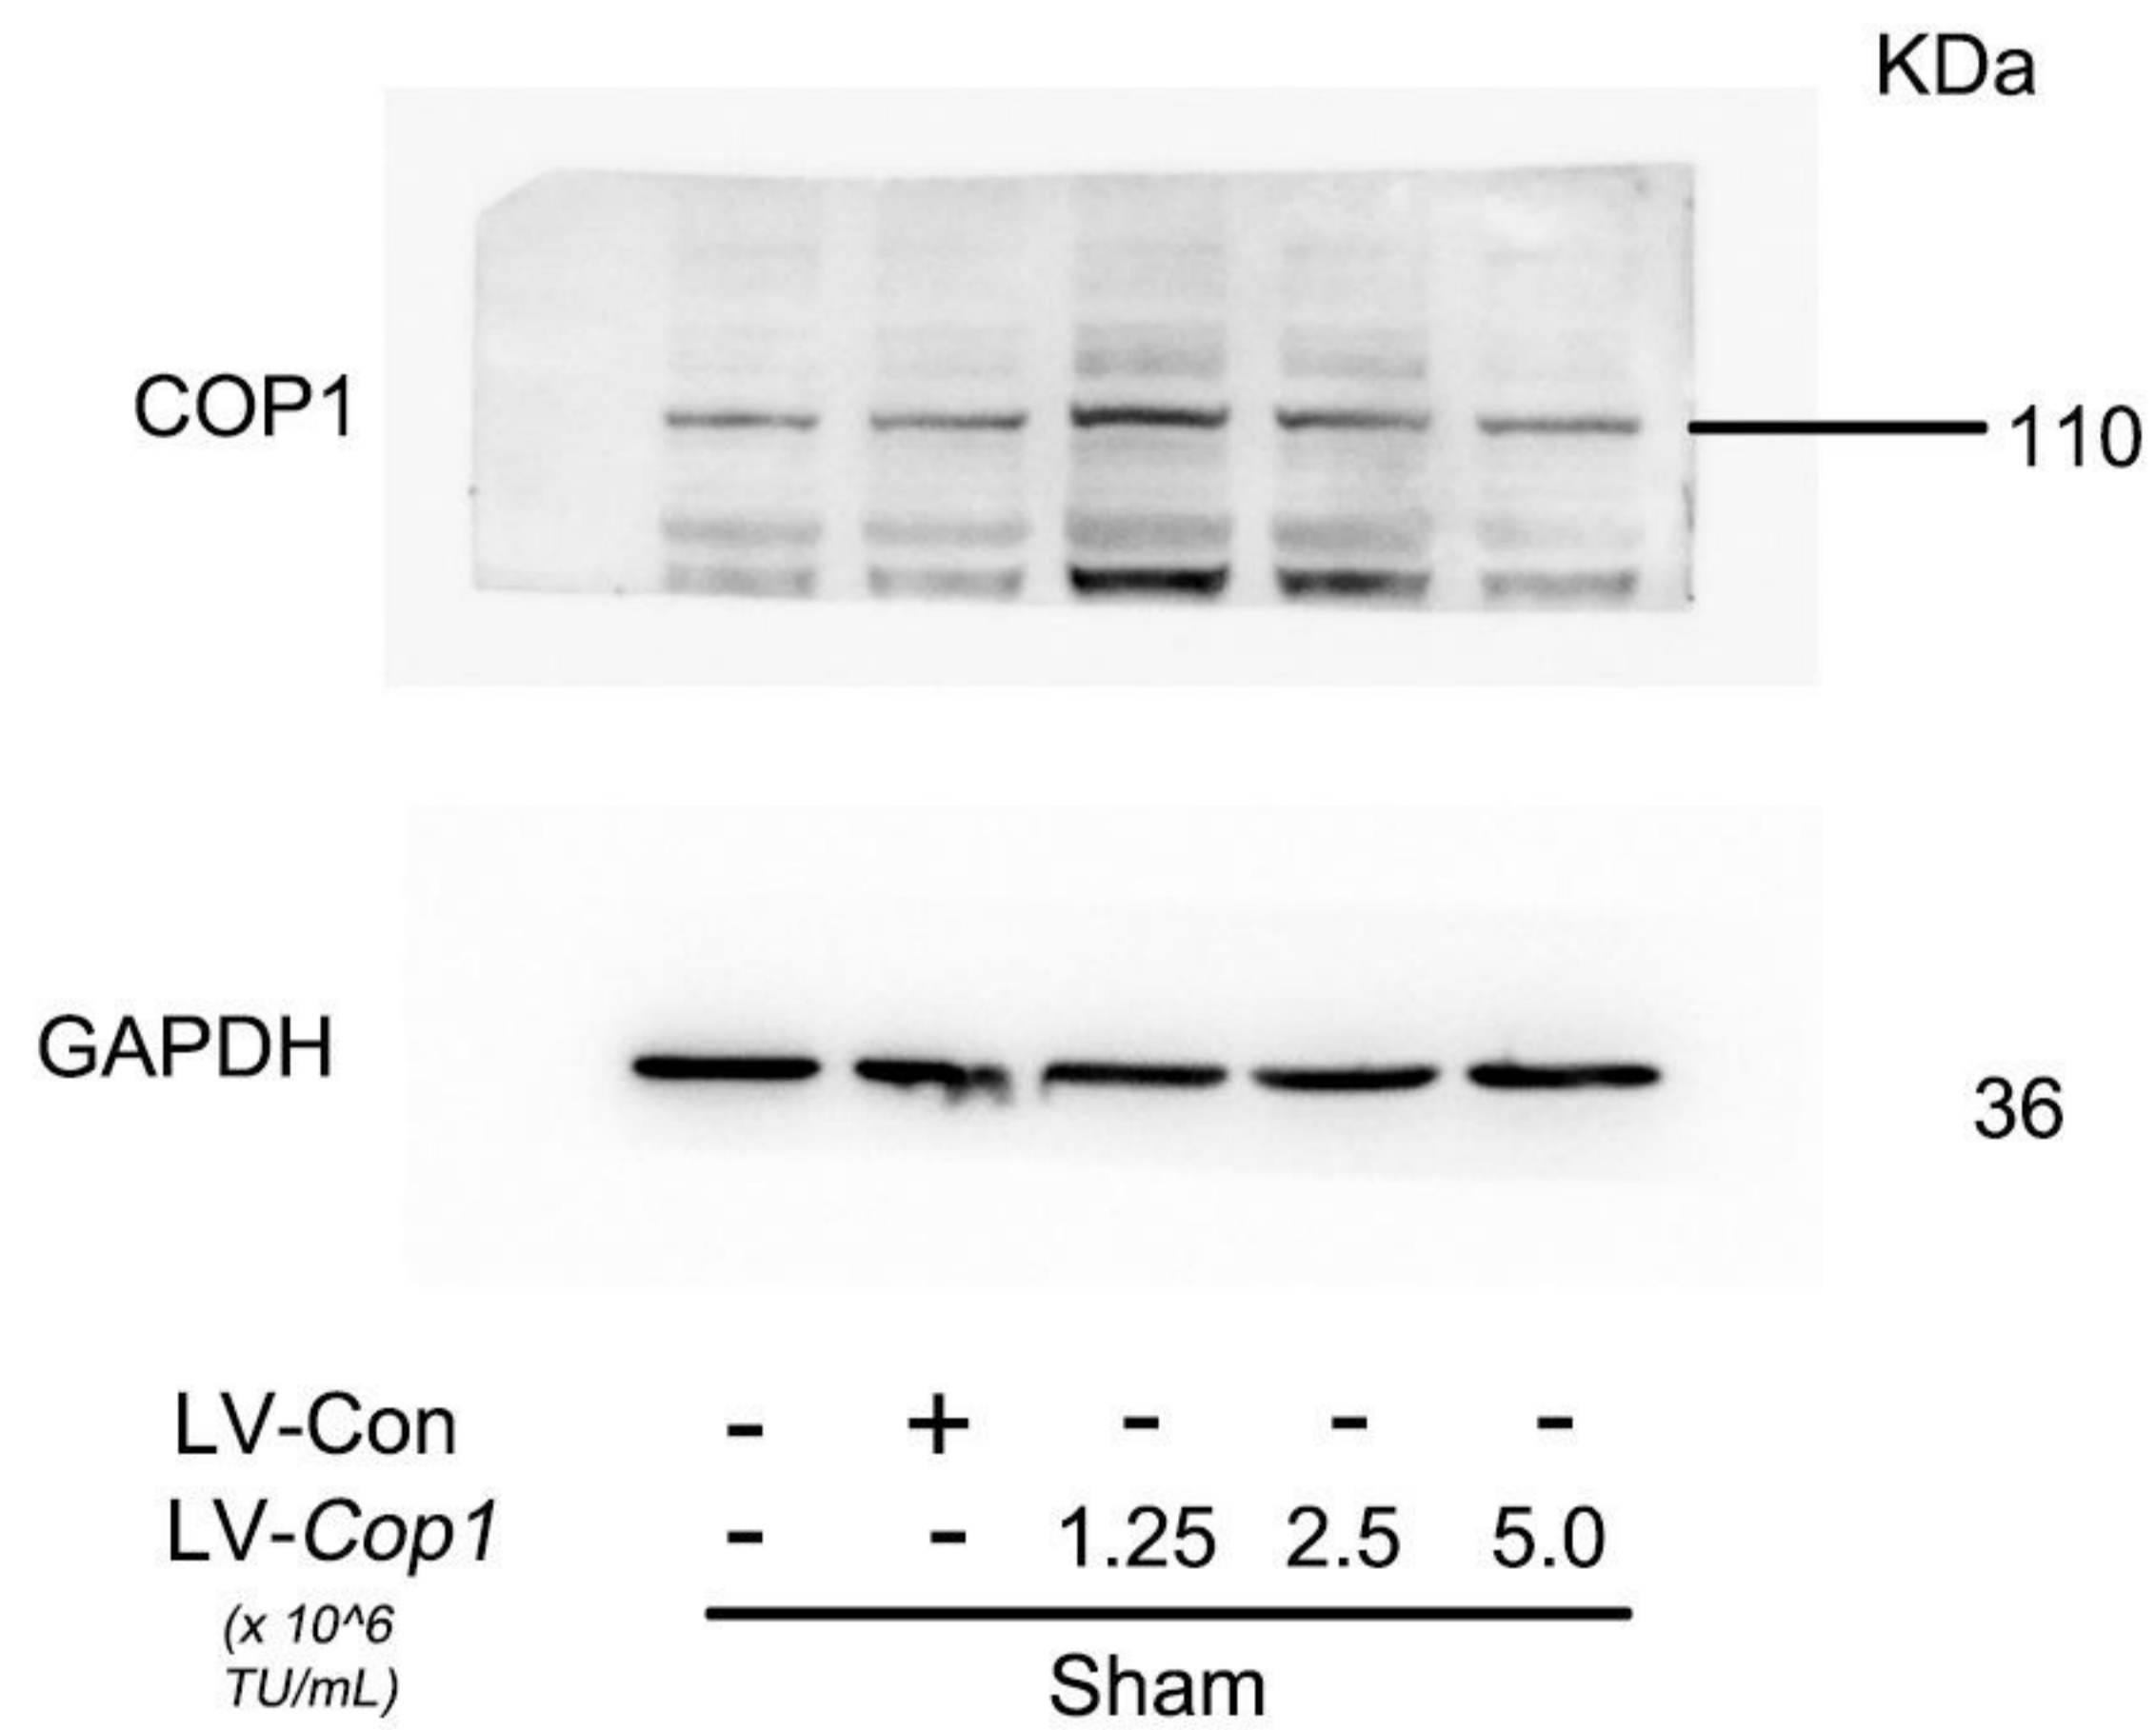

Fig.5F

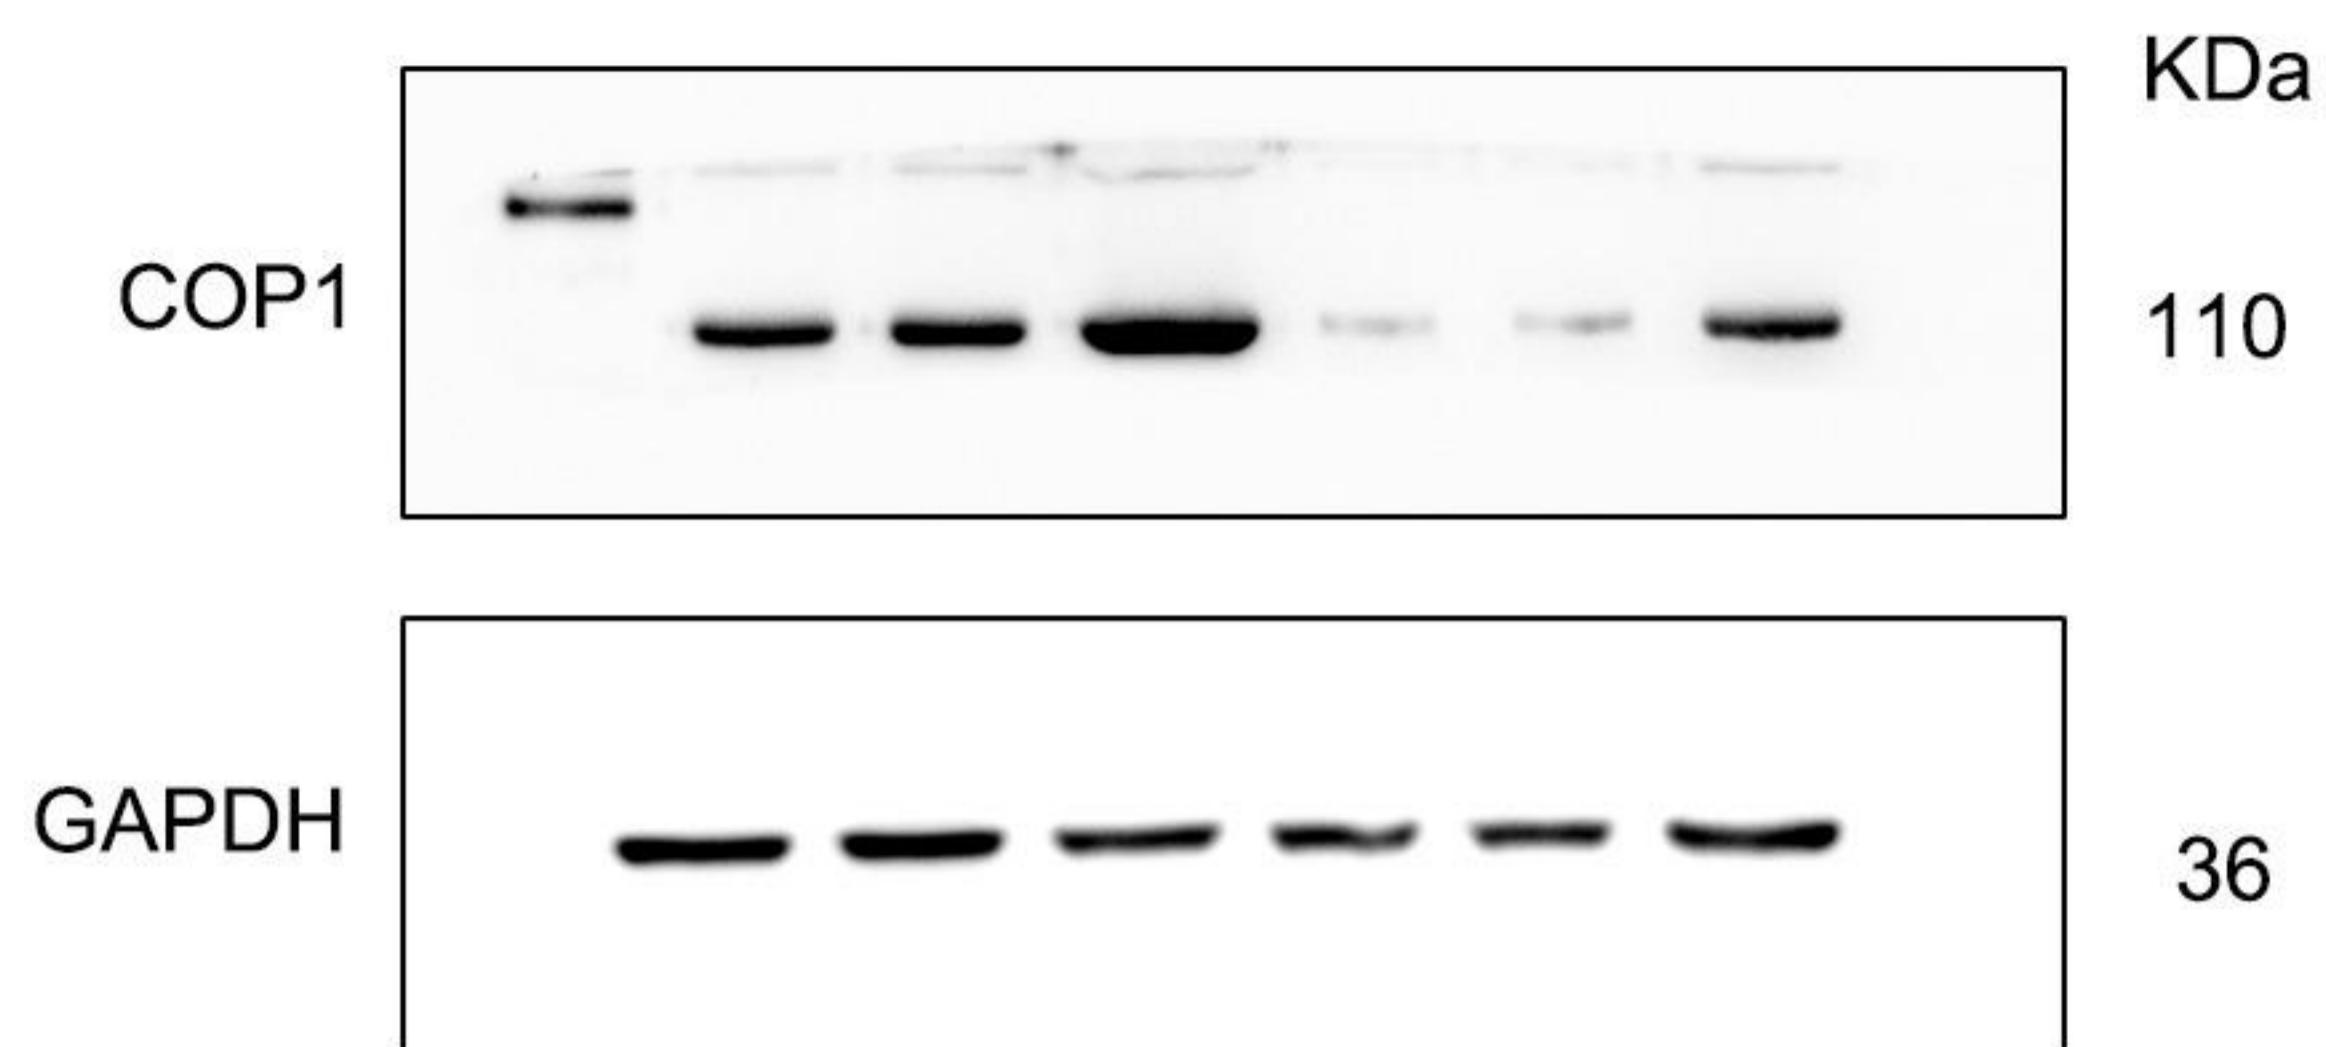

Fig.5G

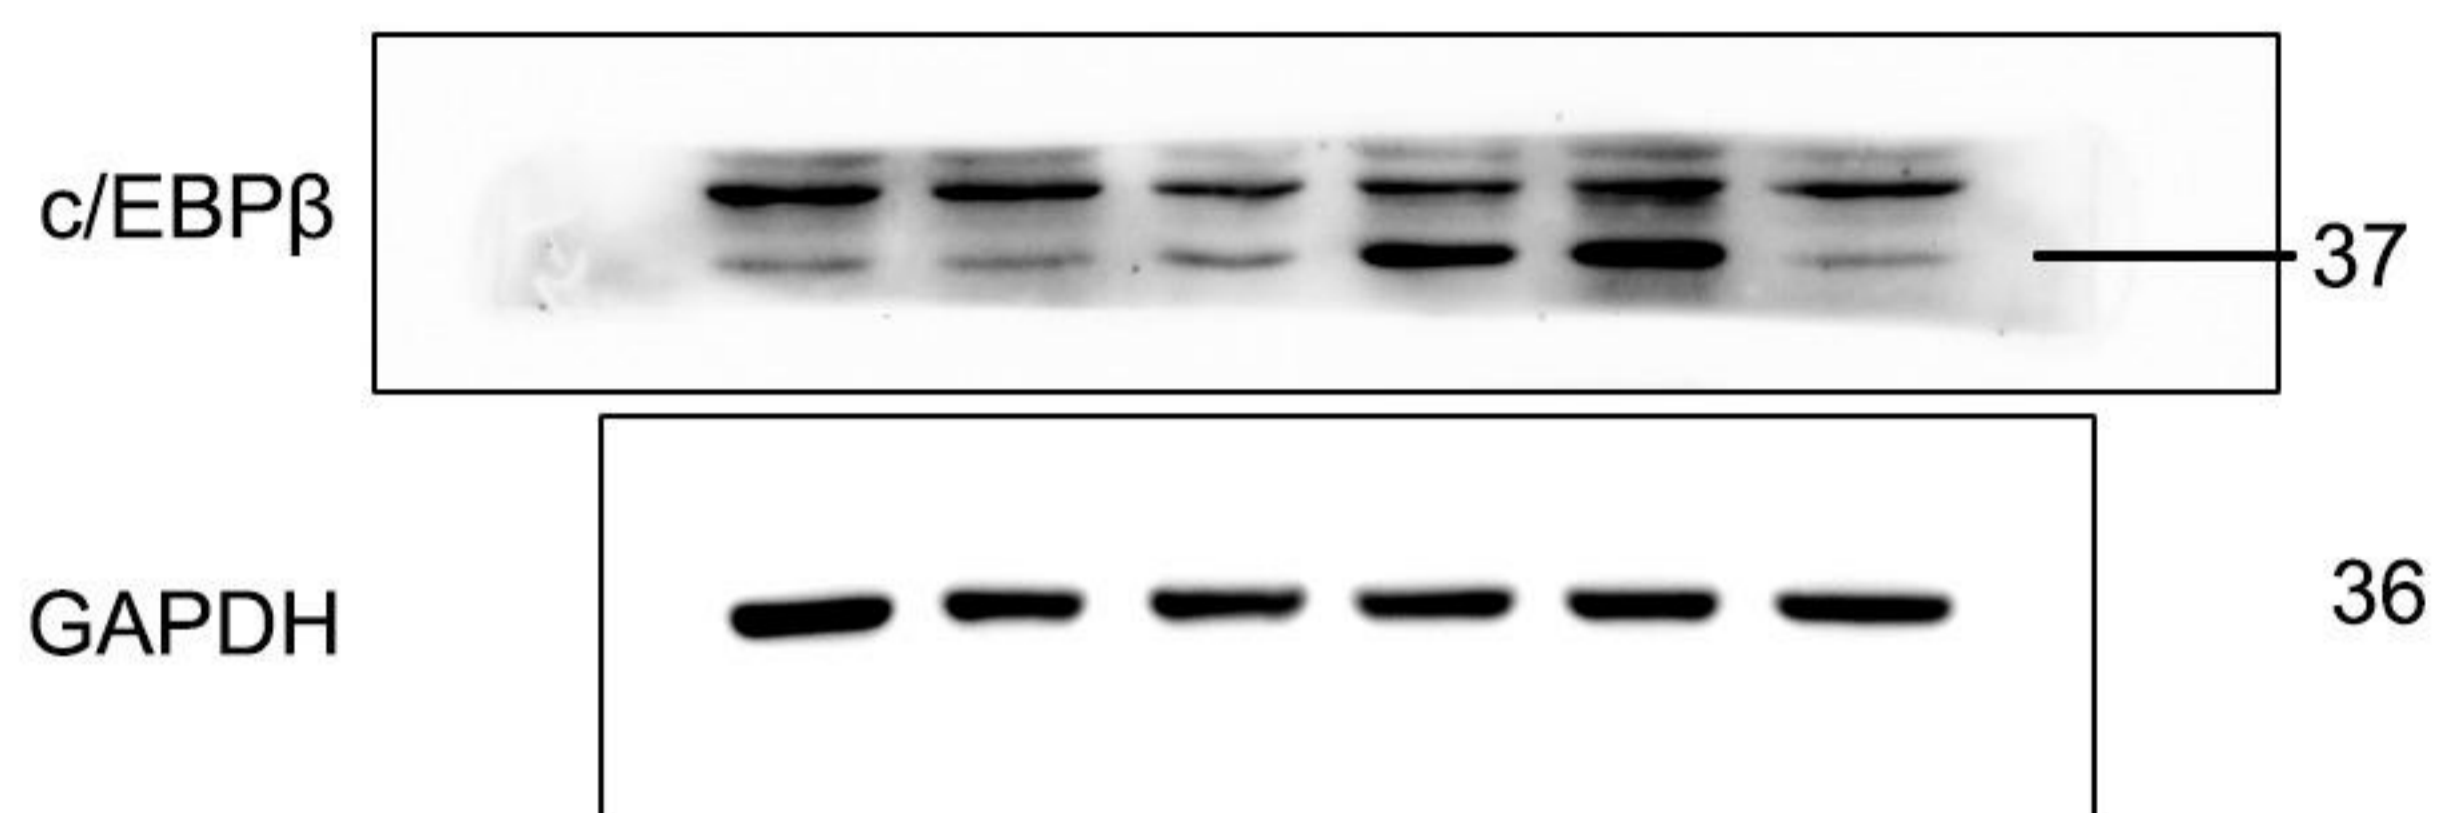

Fig.5I

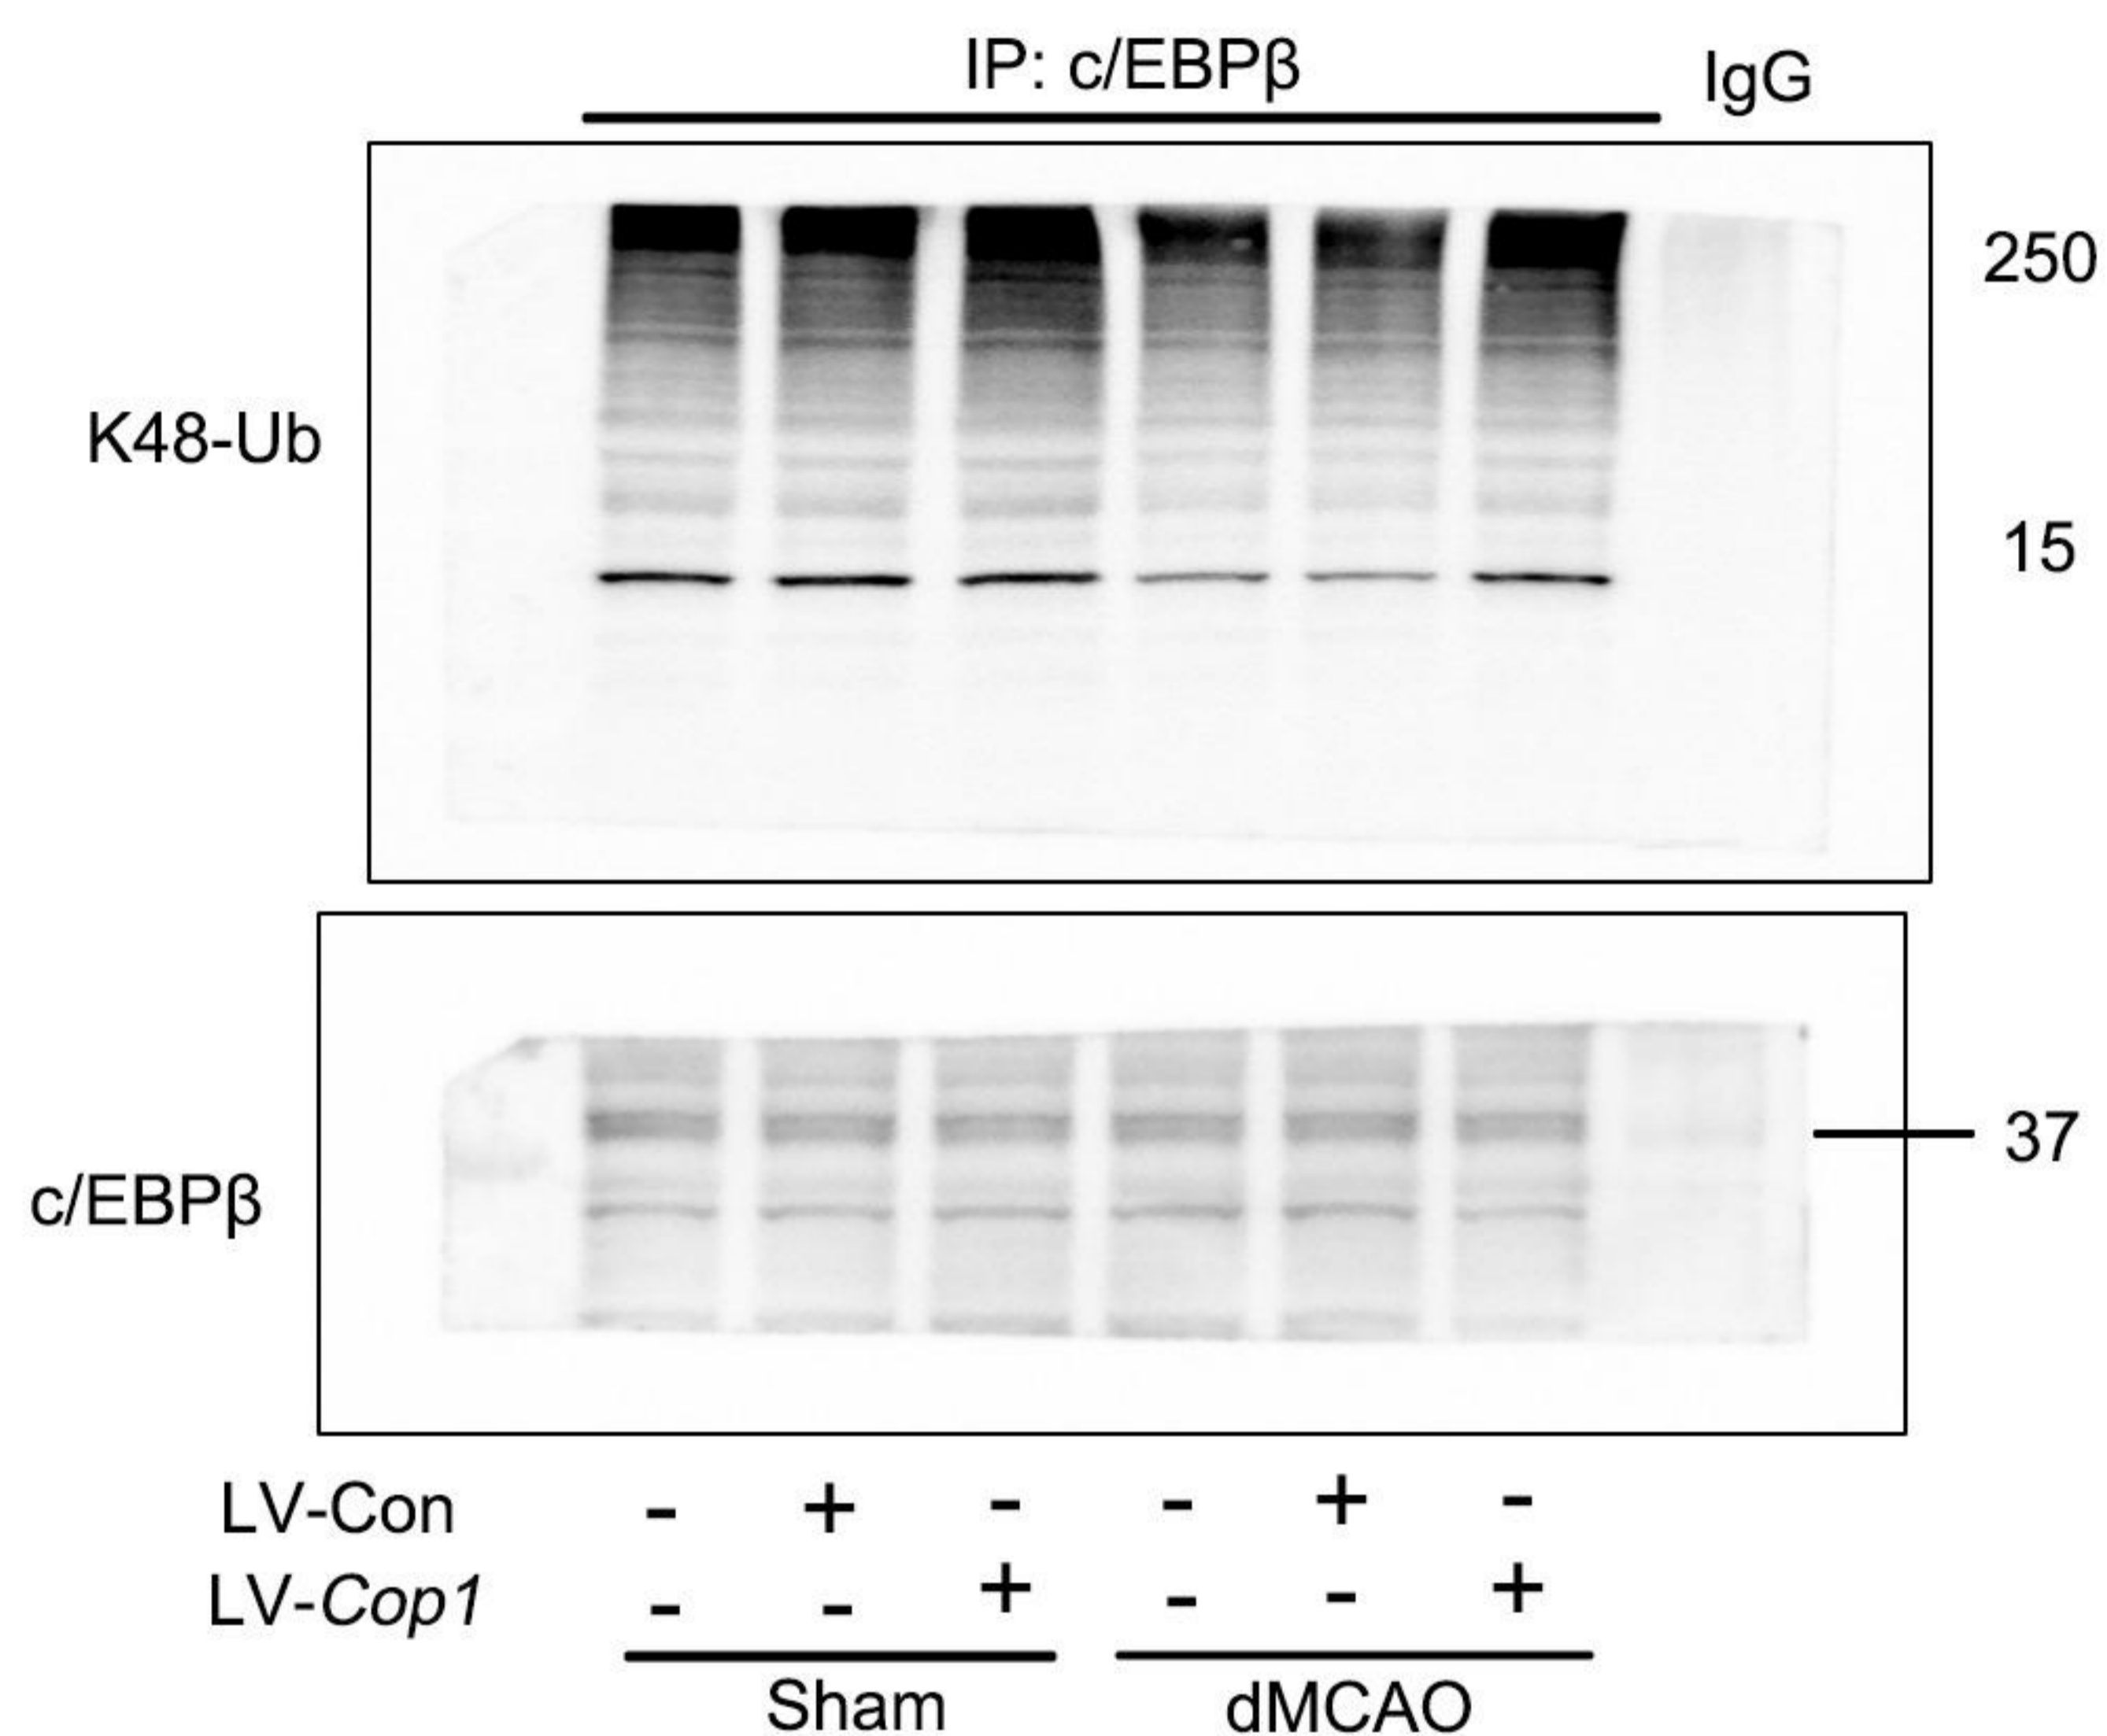

Fig.5J

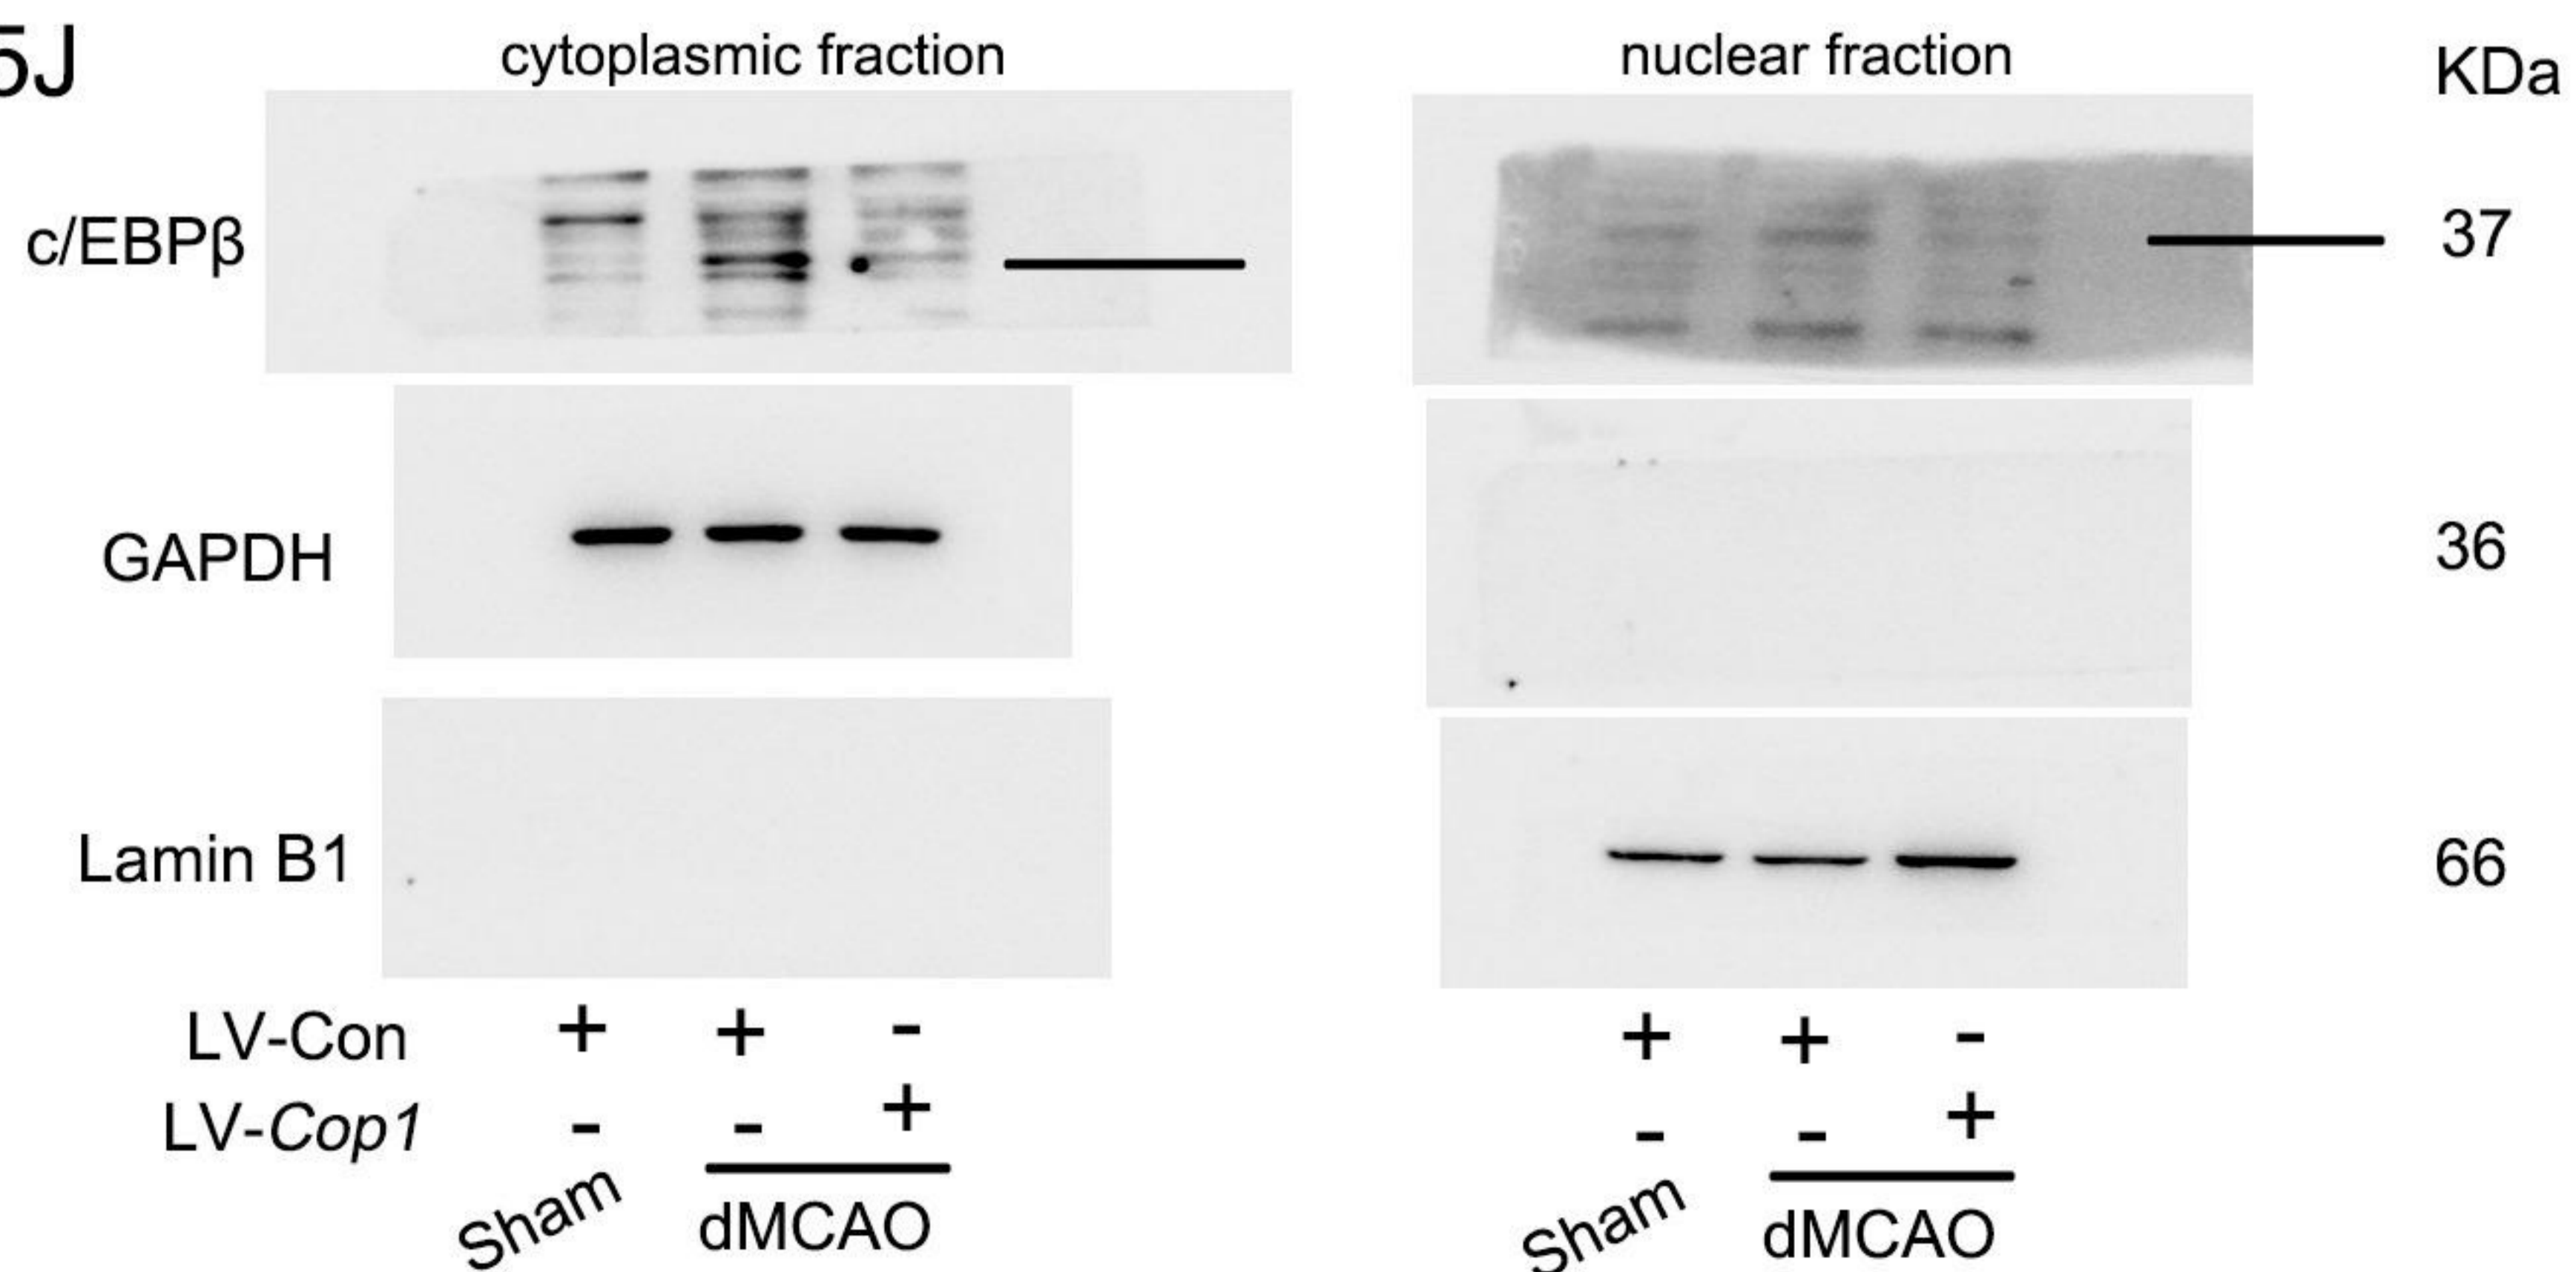

Supplement: Supplementary file 1 [file dd52706b30ef77b2fd81e5ef.pdf]
